1 **Direct reprogramming of human fibroblasts into insulin-producing cells**  
2 **by transcription factors**

3

4 **Running title:** Reprogramming of fibroblasts to insulin-producing cells

5

6 Marta Fontcuberta-PiSunyer<sup>1,2</sup>, Ainhoa García-Alamán<sup>1,3</sup>, Èlia Prades<sup>1</sup>, Noèlia  
7 Téllez<sup>3,4,5</sup>, Hugo Figueiredo<sup>1,2</sup>, Rebeca Fernandez-Ruiz<sup>1,3</sup>, Sara Cervantes<sup>1,3</sup>, Carlos  
8 Enrich<sup>1,2</sup>, Laura Clua<sup>6</sup>, Javier Ramón-Azcón<sup>6</sup>, Christophe Broca<sup>7</sup>, Anne Wojtuszczyń<sup>7,8</sup>,  
9 Anna Novials<sup>1,2</sup>, Nuria Montserrat<sup>6,9,10</sup>, Josep Vidal<sup>1,2,3,11</sup>, Ramon Gomis<sup>1,2,3,12</sup>, Rosa  
10 Gasa<sup>1,3\*</sup>

11

12 <sup>1</sup> Institut d'Investigacions Biomèdiques August Pi i Sunyer (IDIBAPS), Barcelona, Spain

13 <sup>2</sup> Faculty of Medicine and Health Sciences, Universitat de Barcelona, Barcelona, Spain

14 <sup>3</sup> Centro de Investigación Biomédica en Red de Diabetes y Enfermedades Metabólicas  
15 Asociadas (CIBERDEM), Spain

16 <sup>4</sup> Institut d'Investigació Biomèdica de Bellvitge (IDIBELL), Barcelona, Spain

17 <sup>5</sup> Biosciences department, University of Vic - Central University of Catalonia (UVic-  
18 UCC), Vic, Spain

19 <sup>6</sup> Institute for Bioengineering of Catalonia (IBEC), The Barcelona Institute of Technology  
20 (BIST), Barcelona, Spain

21 <sup>7</sup> CHU Montpellier, Laboratory of Cell Therapy for Diabetes (LTCD), Hospital St-Eloi,  
22 Montpellier, France

23 <sup>8</sup> Service of Endocrinology, Diabetes and Metabolism, Lausanne University Hospital,  
24 Lausanne, Switzerland

25 <sup>9</sup>Centro de Investigación Biomédica en Red en Bioingeniería, Biomateriales y  
26 Nanomedicina, Madrid, Spain

27 <sup>10</sup>Catalan Institution for Research and Advanced Studies (ICREA), Barcelona, Spain

28 <sup>11</sup>Endocrinology and Nutrition Department, Hospital Clinic of Barcelona, Barcelona,  
29 Spain

30 <sup>12</sup>Universitat Oberta de Catalunya (UOC), Barcelona

31

32 \*corresponding author and lead contact

33 rgasa@clinic.cat

34

35

36

37

38

39

40

41

42

43

44

45 **ABSTRACT**

46 Direct lineage reprogramming of one somatic cell into another bypassing an  
47 intermediate pluripotent state has emerged as an alternative to embryonic or induced  
48 pluripotent stem cell differentiation to generate clinically relevant cell types. One cell  
49 type of clinical interest is the pancreatic  $\beta$  cell that secretes insulin and whose loss  
50 and/or dysfunction leads to diabetes. Generation of functional  $\beta$ -like cells from  
51 developmentally related somatic cell types (pancreas, liver, gut) has been achieved via  
52 enforced expression of defined sets of transcription factors. However, clinical  
53 applicability of these findings is challenging because the starting cell types are not  
54 easily obtainable. Skin fibroblasts are accessible and easily manipulated cells that  
55 could be a better option, but available studies indicate that their competence to give  
56 rise to  $\beta$  cells through similar direct reprogramming approaches is limited. Here, using  
57 human skin fibroblasts and a protocol that ensures high and consistent expression of  
58 adenovirus-encoded reprogramming factors, we show that the transcription factor  
59 cocktail consisting of Pdx1, Ngn3, MafA, Pax4 and Nkx2-2 activates key  $\beta$  cell genes  
60 and down-regulates the fibroblast transcriptional program. The converted cells produce  
61 insulin and exhibit intracellular calcium responses to glucose and/or membrane  
62 depolarization. Furthermore, they secrete insulin in response to glucose *in vitro* and  
63 after transplantation *in vivo*. These findings demonstrate that transcription factor-  
64 mediated direct reprogramming of human fibroblasts is a feasible strategy to generate  
65 insulin-producing cells.

66

67

68

69

## 70 INTRODUCTION

71

72 The discovery that adult somatic cells can be reprogrammed into induced pluripotent  
73 stem cells (iPSC) <sup>1, 2</sup> has revolutionized current biological and medical research.  
74 Human iPSC can provide valuable platforms for drug and toxicology screens, for  
75 investigating human development and for disease modeling. Furthermore, the  
76 possibility of differentiating iPSC into clinically relevant cell types for autologous cell  
77 therapy has pushed the field of regenerative medicine forward. However, current iPSC  
78 technology is still technically demanding, expensive, time consuming and produces  
79 cells of variable quality. Similarly, design of the *in vitro* differentiation protocols to  
80 generate specific cell types is not trivial. Recapitulation of *in vivo* developmental  
81 pathways using signaling molecules is considered the most effective approach, but  
82 defining and adjusting proper *in vitro* differentiation conditions is not a straightforward  
83 task, and differentiation protocols are often long and expensive, present poor  
84 reproducibility and have variable efficiencies among laboratories.

85

86 An alternative strategy to produce cell types of interest is direct lineage reprogramming,  
87 which entails the direct conversion of one differentiated cell type into another bypassing  
88 an intermediate pluripotent stage. This strategy is often based on the forced expression  
89 of cocktails of transcription factors (TF) that normally function as potent fate  
90 determinants of the cell type of interest in development <sup>3-5</sup>. This approach presents  
91 several advantages over pluripotent cell derivation including its relative simplicity and  
92 speed (fewer induction steps) and, in terms of translational potential, its safety due to  
93 avoidance of the tumorigenic risk associated with pluripotency <sup>6</sup>. Moreover, as with  
94 iPSC, this strategy allows autologous transplantation thus eluding the problem of  
95 allograft rejection.

96

97 Pancreatic beta ( $\beta$ ) cells produce insulin, which controls whole body glucose

98 homeostasis. Relative or complete deficit of functioning  $\beta$  cells is a hallmark of diabetes  
99 and thus  $\beta$ -cell replacement has emerged as a promising therapeutic approach to treat  
100 and eventually cure this disease. To date, derivation of  $\beta$ -cells from pluripotent  
101 (embryonic and iPS) cells has been intensively studied, with significant progress made  
102 during the past fifteen years<sup>7-11</sup>. Yet, current protocols are still on the way of  
103 standardization and face important challenges including low number and functional  
104 maturation of generated  $\beta$ -like cells<sup>12, 13</sup>. Direct lineage reprogramming strategies to  
105 create  $\beta$ -cells bypassing the iPSC stage have also been explored. In this line, the  
106 Melton laboratory developed the first TF-based *in situ* conversion of mouse pancreatic  
107 exocrine cells towards insulin-producing cells through expression of three TFs: Pdx1,  
108 Ngn3 and MafA (hereafter PNM)<sup>14</sup>. Subsequently, these factors, individually or  
109 combined, have been shown to promote  $\beta$ -cell-like features in related endodermal cell  
110 lineages such as pancreatic ductal cells, hepatic, intestinal or stomach cells<sup>15-21</sup>.

111

112 One central aspect in direct reprogramming approaches, particularly when considering  
113 their clinical applicability, is the choice of cell source. Ideally, the starting material  
114 should be accessible, easy to handle/grow and susceptible to reprogramming. To date  
115 fibroblasts, which can be readily obtained from small skin biopsies, are commonly used  
116 as cell source for iPSC generation. Remarkably, they have also been directly  
117 reprogrammed towards somatic cell types including cardiomyocytes<sup>22</sup>, chondrocytes<sup>23</sup>,  
118 neurons<sup>24</sup> or oligodendrocyte progenitors<sup>25</sup>. In the pancreas field, human fibroblasts  
119 have been converted into expandable pancreatic progenitor populations through  
120 transient overexpression of iPSC factors in conjunction with lineage-determining  
121 soluble factors<sup>26</sup> and into insulin-producing cells following long protocols that are  
122 reminiscent of the small molecule-based directed differentiation procedures applied to  
123 stem cells<sup>26-28</sup>. However, attempts to use cell-specific TFs to directly transform  
124 fibroblasts into  $\beta$  cells have yielded discouraging results<sup>14, 20, 29, 30</sup>.

125

126 The growing potential of direct lineage reprogramming to generate specialized cell  
127 types, the medical interest in pancreatic  $\beta$  cells and the prevailing challenges for the  
128 generation of these cells via conventional directed differentiation from pluripotent cells,  
129 prompted us to examine the amenability of fibroblasts to be reprogrammed to  $\beta$  cells  
130 using cell-specific transcription factors in a more comprehensive manner. Here we  
131 show that the combination of five endocrine TF induces activation of the  $\beta$ -cell  
132 transcriptional program in human fibroblasts. Furthermore, we show that  
133 reprogrammed fibroblasts produce and secrete insulin *in vitro* and *in vivo*. We believe  
134 these findings demonstrate the feasibility of this approach and set the basis to explore  
135 this path for generation of insulin-producing cells for disease modeling and cellular  
136 therapy.

137

## 138 **MATERIALS and METHODS**

139

### 140 **Fibroblasts**

141 Human foreskin fibroblasts were prepared from a foreskin biopsy from a 3-year old  
142 individual after obtaining his parents' written informed consent (HFF1). Adult human  
143 dermal fibroblasts were prepared from arm biopsies of two T1D individuals after  
144 obtaining their written informed consent (HDF-DT1-1, HDF-DT1-2). In brief, skin  
145 samples were collected in sterile saline solution, divided into small pieces, and allowed  
146 to attach to cell culture dishes before adding Iscove's modified Dulbecco's medium  
147 (Invitrogen, Carlsbad, CA, USA) supplemented with 10% human serum (Sigma, St.  
148 Louis, MO, USA) and penicillin/streptomycin (0.5X) (Invitrogen). After 10 days of  
149 culture at 37°C, 5% CO<sub>2</sub>, fibroblast outgrowths were dissociated and split 1:4 using a  
150 recombinant trypsin-like enzyme (TrypLE Select, Invitrogen). Additional fibroblast  
151 preparations were commercially available: HFF2 (SCRC1041<sup>TM</sup>, ATCC, Manassas, VA,  
152 USA) and HDF-1 (PCS-201-012, ATCC) and HDF-2 (Cell Applications, San Diego, CA,  
153 USA).

154

## 155 **Human islets**

156 Human islets were prepared by collagenase digestion followed by density gradient  
157 purification at the Laboratory of Cell Therapy for Diabetes (Hospital Saint-Eloi,  
158 Montpellier, France), as previously described<sup>31</sup>. After reception in Barcelona, human  
159 islets were maintained in culture for 1-3 days in RPMI-1640 with 5.5mM glucose, 10%  
160 fetal bovine serum (FBS) and antibiotics, before performing the experiments.  
161 Experiments were performed in agreement with the local ethic committee (CHU,  
162 Montpellier) and the institutional ethical committee of the French Agence de la  
163 Biomédecine (DC Nos. 2014-2473 and 2016-2716). Informed consent was obtained for  
164 all donors.

165

## 166 **Recombinant adenoviruses**

167 The adenoviral expression vector pAd/CMV/V5-DEST carrying mouse Pdx1, Ngn3,  
168 MafA and 2A-Cherry under the CMV promoter was kindly provided by Dr. Q. Zhou,  
169 Harvard University<sup>29</sup>. The recombinant adenovirus (termed Ad-PNM) was generated  
170 after Pac1 digestion and transfection into HEK293 cells. The recombinant adenovirus  
171 encoding Pdx1 was kindly provided by the Beta Cell Biology Consortium. The  
172 recombinant adenovirus encoding MafA was purchased from Vector Biolabs (Chicago,  
173 IL, USA). All other recombinant adenoviruses encoding single transcription factors  
174 (Ngn3, NeuroD1, Nkx2.2, Nkx6.1 and Pax4) were described previously<sup>18, 32</sup>.

175

## 176 **Reprogramming protocol**

177 Fibroblasts were grown in DMEM media supplemented with 10% (v/v) fetal bovine  
178 serum (FBS), 100 U/ml penicillin, 100 µg/ml streptomycin and 1% Glutamax. They  
179 were plated onto 96-well plates (9 500 cells per well) for MTT and BrdU assays, onto  
180 12-well plates (1.25x10<sup>5</sup> cells/well) for gene expression, insulin secretion,  
181 immunofluorescence and caspase assays and onto 10 cm plates (1.5x10<sup>6</sup> cells/plate)

182 for transplantation experiments. Infection with Ad-PNM was performed when fibroblasts  
183 reached 80% confluence, normally 1-2 days after seeding. In brief, for 12-well plates,  
184 fibroblasts were incubated with 0.6ml complete culture medium containing Ad-PNM at  
185 a dose of 15 moi (multiplicity of infection) for 16-20 h. After virus removal, media was  
186 changed to RPMI-1640 medium containing 6% FBS and antibiotics. Two and five days  
187 after incubation with Ad-PNM, fibroblasts were infected for 6-8 h with Ad-Pax4 (50 moi)  
188 and Ad-Nkx2.2 (50 moi) respectively. The transfection reagent Superfect (Qiagen,  
189 Venlo, Netherlands) was always added to the virus-containing media in order to  
190 achieve efficient adenoviral infection and transgene expression in fibroblasts. Amounts  
191 were scaled down or up according to the well size. To prepare spheroids, one day after  
192 Ad-Nkx2.2 infection, cells were trypsinized and transferred (1 200-1 800 cells/ well) to  
193 96-well Nunclon Sphera plates (Thermo Scientific) for gene expression,  
194 immunofluorescence and insulin secretion assays. Cell spheroids (1 000 cells/cluster)  
195 for transplantation were generated in AggreWell plates (StemCell Technologies,  
196 Saint Égrève, France)

197

### 198 **RNA isolation and reverse transcriptase polymerase chain reaction (RT-PCR)**

199 Total RNA from cultured cells was isolated using NucleoSpin®RNA (Macherey-Nagel),  
200 Düren, Germany) following the manufacturer's manual. Total RNA from enucleated  
201 eyes was extracted using Trizol reagent (Sigma) and then cleaned and DNase-treated  
202 using RNeasy mini columns (Qiagen) prior to cDNA synthesis. First-strand cDNA was  
203 prepared using Superscript III Reverse Transcriptase (Invitrogen) and random  
204 hexamers in a total volume of 20 ul and 1/40 to 1/200 of the resulting cDNA was used  
205 as a template for real time PCR reactions. Real time PCR was performed on an ABI  
206 Prism 7900 detection system using Gotaq master mix (Promega, Madison, WI, USA).  
207 Expression relative to the housekeeping gene *TBP* was calculated using the delta(d)Ct  
208 method and expressed as  $2^{-(dCT)}$  unless otherwise indicated. Primer sequences are  
209 provided in Table S3.



210

### 211 **BrdU and MTT assays**

212 For quantification of cell proliferation, cells in 96-well plates were cultured overnight  
213 with medium containing 5-bromo-2'-deoxuridine (BrdU). BrdU incorporation was  
214 determined colorimetrically with the Cell proliferation ELISA kit (Roche, Basilea,  
215 Switzerland) following the manufacturer's instructions. For assessing cell viability, cells  
216 grown in 96-well plates were incubated with medium containing 0.75 mg/ml of 3-(4,5-  
217 dimethylthiazol-2-yl)-2,5-diphenyltetrazolium bromide (MTT) for 3 hours at 37°C. The  
218 resulting formazan crystals were solubilized in Isopropanol/0.04 N HCl solution and  
219 optical density<sup>1</sup> was read at 575 nm and 650 nm using a Synergy HT reader (BIO-TEK  
220 Instruments, Winooski, VT, USA). The OD (575-650) was expressed relative to control  
221 fibroblasts, which were given the value of 100%.

222

### 223 **Calcium imaging**

224 To study glucose-dependent calcium influx, cells were washed with Hanks' Balanced  
225 Salt Solution (HBSS, Sigma) and incubated with Fluo4-AM (Life Technologies) in fresh  
226 2.5 mM glucose Krebs-Ringer bicarbonate buffer for 1 hour at 37°C in the  
227 dark. Intracellular calcium fluorescence was recorded from fluo-4-loaded cells using a  
228 Leica TCS SPE confocal microscope with an incubation chamber set at 37C, and a 40x  
229 oil immersion objective. Fluorescent images and average fluorescence intensity were  
230 acquired at 600Hz every 1.8 seconds, using a 488nm excitation laser, an emission set  
231 at 520 with a bandwidth of 10nm. Image registry consisted of: 5 min in 2 mM glucose-  
232 Krb buffer, 10 min in 22 mM glucose-Krb buffer and 5 min in 30 mM KCl-Krb buffer.  
233 Average fluorescence intensity images of each individual cell were analyzed with LAS  
234 AF Lite and Fuji programs.

235

### 236 **In vitro glucose-induced insulin secretion and content**

237 Cells in 2D or 3D aggregates were washed with phosphate-buffered saline (PBS) and  
238 preincubated for 30-45 min at 37°C in HEPES-buffered Krebs-Ringer buffer with 2mM  
239 glucose. Preincubation solution was then removed and cells incubated with the same  
240 buffer containing different glucose concentrations glucose for additional 90 min.  
241 Supernatants were collected to measure secreted insulin or C-peptide. Cells were  
242 lysed in detergent-containing buffer (Tris-HCl pH8 50mM, NaCl 150mM, SDS 0.1%  
243 (w/v), Igepal CA-630 1%, Na deoxycholate 0.5%) to determine C-peptide content.  
244 Human insulin was measured using a human Insulin ELISA kit (Crystal Chem,  
245 Zaandam, Netherlands) and C-peptide using a human C-peptide ELISA kit (Merckodia,  
246 Uppsala, Sweden).

247

#### 248 **Electron microscopy**

249 Cell spheroids were collected, washed with PBS and fixed with 4% paraformaldehyde/  
250 0.5% glutaraldehyde (Sigma) mixture in 0.1M phosphate buffer (PB) pH7.4 for 30min at  
251 4°C and gentle agitation. Cells were then transferred to fresh fixation solution and  
252 maintained at 4°C until secondarily fixed with 1% uranyl acetate and 1% osmium  
253 tetroxide. Cells were then dehydrated, embedded in Spurr's Resin and sectioned using  
254 Leica ultramicrotome (Leica Microsystems). Conventional transmission electron  
255 microscopy (TEM) images were acquired from thin sections using a JEOL-1010  
256 electron microscopy equipped with an SC1000 ORIUS-CCD digital camera (Gatan).

257

#### 258 **Transplant procedures**

259 Adult (12-20 week old) immunocompromised NSG-SCID mice (005557, Jackson  
260 Laboratories) received implants in the anterior chamber of the eye (ACE),  
261 subcutaneously or between the omental sheets as previously described<sup>33, 34</sup>. A total of  
262 150-200 human islets, 300 iβ-like cell or HFF1 spheroids (1 200-1 800 cells/cluster)  
263 were transplanted per eye and approximately 4000-iβ-like cell spheroids (750-1 000  
264 cells/cluster) were transplanted into either of the other two implant sites. For

265 subcutaneous and omental transplants, collagen scaffolds were used. Briefly, the cell-  
266 laden collagen hydrogel was prepared by mixing 150  $\mu$ l of a 4 mg/ml rat tail type I  
267 collagen (Corning, NY, USA) solution, prepared following the manufacturer's  
268 instructions, with i $\beta$ -like cell clusters (pelleted by gentle centrifugation) and poured onto  
269 a cylindrical 8 mm diameter x 1 mm thick PDMS mold (Dow Corning Sylgard 184  
270 Silicone Elastomer). The hydrogel was polymerized for 20 min at 37 °C, detached from  
271 the mould and maintained in tissue culture dishes with warm RPMI-1640 medium until  
272 transplant (usually 2-3 hours). Constructs were introduced in the abdominal  
273 subcutaneous space through a small (1–2 mm) incision. Alternatively, constructs were  
274 placed on the omentum close to the duodenal-stomack junction and fixed using  
275 Histoacryl translucent (Braun, Kronberg im Taurus, Germany). The local ethical  
276 committee for animal experimentation of the University of Barcelona approved all  
277 animal experiments and procedures.

278

### 279 **Graft viability and function analysis**

280 To assess vascularization and cell viability in ACE implants, i $\beta$ -like clusters were  
281 labeled with the long-term tracer for viable cells CFDA (Invitrogen) before  
282 transplantation. At day 10 post-transplantation, mice received an intravenous injection  
283 of RITC-dextran and in vivo imaging was used to assess functional vascularization and  
284 cell viability <sup>34</sup>. For determination of glucose-induced insulin secretion, mice were  
285 fasted for 5-6 h and then injected intraperitoneally with glucose (3g/Kg). Aqueous  
286 humor from mice with ACE implants was obtained 30 minutes after the glucose  
287 challenge and kept frozen until human insulin determination. Tail blood before and after  
288 (20 minutes) the glucose challenge was obtained from mice with subcutaneous and  
289 omental implants. Human insulin in aqueous humor and in plasma was determined  
290 using an ultrasensitive Human Insulin ELISA (Chrysal Chem).

291

### 292 **Immunofluorescence**

293 iβ-like cells grown in 2D were fixed with 4% (v/v) paraformaldehyde (PFA) during 15  
294 min and incubated with blocking solution (0.25% (v/v) Triton, 6% (v/v) donkey serum,  
295 5% (w/v) BSA in PBS for 1 h at room temperature. Slides were then incubated with  
296 primary antibodies diluted in PBS-triton 0.1% (v/v) containing 1% donkey serum  
297 overnight at 4 °C. iβ-like cells grown in spheroids were fixed with 4% (v/v)  
298 paraformaldehyde (PFA) for 15 min at 4°C, permeabilized with 0.5% (v/v) Triton in PBS  
299 for 20 min and blocked with 0.5% (v/v) Triton/ FBS 10% (v/v) in PBS during 1 h at room  
300 temperature. Slides were then incubated with primary antibodies diluted in blocking  
301 solution overnight at 4°C. Eyes were obtained by enucleation, fixed overnight in 2%  
302 (v/v) PFA, dehydrated with ethanol gradient, cleared with xylene and paraffin-  
303 embedded. 3-μm thick eye sections were used for standard immunofluorescence  
304 staining protocol. Images were acquired in a Leica DMR HC epifluorescence  
305 microscope (Leica Microsystems).  
306 Primary antibodies used were: Insulin (DAKO, 1:400), C-peptide (Abcam, 1: 200 or  
307 Hybridoma Bank; 1:40), vimentin (Sigma, 1:200), HLA (Abcam, 1:100), Nkx-2.2  
308 (Hybridoma Bank, 1:400), Pdx1 (Abcam 1:500) and MafA (Novus Biologicals 1:75).  
309 The antigen-primary antibody immune complex was visualized with secondary  
310 antibodies conjugated to Alexa Fluor 488 (Jackson ImmunoResearch, 1:250), Alexa  
311 fluor 555 (Molecular Probes, 1:400) or Alexa fluor 647 (Jackson ImmunoResearch,  
312 1:250). Cell nuclei were counterstained with Hoescht (SIGMA, 1:500). Representative  
313 images were taken using a confocal microscope (LEICA TCS SPE).

314

### 315 **Statistical analysis**

316 Data are presented as mean ± standard error of the mean (SEM) from at least three  
317 independent reprogramming experiments, with one to four biological replicates per  
318 experiment. Significant differences between the means were analyzed by the two-tailed  
319 unpaired Student's *t*-test, one sample *t*-test or one-way ANOVA followed by Tukey's  
320 multiple comparison tests as indicated in the figure legends. Statistical analysis was

321 performed with GraphPad Prism 8.00 and Microsoft Office Excel 2007 and differences  
322 were considered significant at  $p < 0.05$ . No methods were used to determine whether  
323 the data met assumptions of the statistical approach (e.g. test for normal distribution).

324

## 325 **RESULTS**

### 326 **Introduction of the transcription factors Pdx1, Ngn3 and MafA (PNM) leads to** 327 **activation of $\beta$ -cell genes and insulin production by human fibroblasts.**

328 We first investigated whether human fibroblasts could be directly converted towards the  
329  $\beta$ -cell lineage through exogenous expression of the PNM factors Pdx1, Neurog3 and  
330 MafA. As delivery method we used a polycistronic adenoviral vector encoding the three  
331 transcription factors and a Cherry reporter protein (Ad-PNM hereafter) that had been  
332 previously used in the reprogramming of pancreatic acinar cells towards islet cells <sup>35</sup>.  
333 We chose adenoviruses for transgene delivery because they allow high expression of  
334 transgenic proteins and, most importantly, don't integrate in the host genome.  
335 However, we couldn't detect Cherry immunofluorescence after viral treatment of human  
336 fibroblasts (Fig. S1), which was in agreement with other reports showing poor  
337 adenoviral transduction efficiency in fibroblastic cells <sup>36, 37</sup>. In an attempt to boost  
338 adenoviral transduction, we added an activated dendrimer normally used in  
339 transfections to the virus-containing media and, in stark contrast to Ad-PNM alone, we  
340 observed abundant (>80%) fibroblasts that were Cherry<sup>+</sup> three days after exposure to  
341 the virus+dendrimer (Fig.S1 and Fig.1A). Interestingly, Cherry<sup>+</sup> cells were still readily  
342 visible 7 days post-viral treatment (Fig. 1A). Likewise, transcripts encoding the PNM  
343 factors were detected at 3 and 7 days after viral treatment (Fig.1B). Remarkably, three  
344 days after addition of Ad-PNM we detected low levels of *INS* transcripts that were  
345 dramatically increased by day 7 (Fig.1C). We examined the influence of distinct culture  
346 media on *INS* mRNA levels and found that cells cultured in RPMI-1640 supplemented

347 with 6% FBS exhibited the highest degree of *INS* gene activation relative to cells  
348 cultured in DMEM or CMRL-1066, reaching values that were 900-fold lower than  
349 human islets but similar to those attained in directed differentiation protocols from iPSC  
350 <sup>38</sup> (Fig. 1D). The PNM factors also induced moderate levels of several endocrine  
351 transcription factor genes including *NEUROD1*, *INSM1*, *PAX4*, *NKX2-2* and *ARX*,  
352 although they did not induce the key  $\beta$ -cell TF *NKX6-1* (Fig.1E). Unexpectedly, the  
353 PNM factors also induced the islet hormone genes *GLUCAGON (GCG)* and  
354 *SOMATOSTATIN (SST)*, albeit to levels less than those observed for *INS* (as indicated  
355 by lower expression relative to the housekeeping gene *TATA BINDING PROTEIN*,  
356 (*TBP*) (Fig. 1F). Conversely, PNM down-regulated the expression of genes associated  
357 with fibroblast signature, including several factors involved in maintenance of the  
358 fibroblastic transcriptional program such as *TWIST2*, *PRRX1* and *LHX9* <sup>39</sup> (Fig. 1G).  
359 Together, these experiments show that the PNM factors induce a transcriptional switch  
360 from a fibroblastic towards an endocrine program in human fibroblasts.

361 **Addition of Pax4 and Nkx2-2 to the PNM factors improves reprogramming of**  
362 **human fibroblasts towards the  $\beta$ -cell lineage.**

363 Due to the suboptimal conversion of fibroblasts into  $\beta$ -like cells using the PNM factors  
364 (i.e. as reflected by the lack of induction of *NKX6-1* mRNA and the expression of other  
365 endocrine hormones), we tested the effects of adding other transcription factors to the  
366 reprogramming cocktail, namely Nkx6-1, Pax4, NeuroD1 and Nkx2-2. Among all tested  
367 combinations, we found that expression of PNM in a single polycistronic adenovirus  
368 followed by sequential expression of Pax4 and Nkx2-2 (hereafter this combination is  
369 named 5TF) resulted, ten days after initial PNM infection, in the highest degree of *INS*  
370 gene activation accompanied by the blockade of *GCG* gene induction (Fig. 2A&B and  
371 Fig.S2). Moreover, 5TF reprogramming resulted in activation of *NKX6.1* and of the  
372 pan-endocrine factor *PAX6 genes* (Fig. 2B). At day 10, reprogrammed cells displayed  
373 an epithelial morphology (Fig. 2C) and hadn't grown as much as untreated fibroblasts

374 (day 10; 5TF:  $44 \times 10^3 \pm 3 \times 10^3$  cells/well; control:  $238 \times 10^3 \pm 18 \times 10^3$  cells/well, n=18). In  
375 fact, reprogrammed cells showed diminished proliferation as early as one day after  
376 PNM introduction, while remaining viable, as indicated by their retained ability to  
377 reduce MTT, similar to that of fibroblasts (Fig. 2D&E). At day 10, reprogrammed cells  
378 exhibited lower MTT reduction activity, likely due to their decreased cell numbers (Fig.  
379 2E).

380 Consistent with the gene expression data, insulin protein was detected by  
381 immunofluorescence staining in both PNM and 5TF cells, being staining more robust in  
382 5TF cells than in PNM cells (Fig. 2F). By contrast, neither glucagon nor somatostatin  
383 proteins were detected in either PNM or 5TF cells. We quantified the  
384 immunofluorescence images and found that  $67.9 \pm 6.2\%$  of cells in the culture were  
385 INS+ at day 10. The presence of endogenous insulin production was further confirmed  
386 by immunofluorescence staining using an antibody against C-peptide (Fig.2G) and by  
387 determining C-peptide content with an ELISA (control:  $0.34 \pm 0.14$  pg/ $10^5$  cells, n=9;  
388 5TF:  $16.06 \pm 2.55$  pg/ $10^5$  cells, n=16). To further establish the extent of reprogramming  
389 achieved with 5TF as compared to PNM, we studied expression of additional endocrine  
390 genes at day 10. We found that transcripts of  $\beta$ -cell differentiation TFs (i.e. *NEUROD1*,  
391 *INSM1*, *HNF1B*, *MAFB*), as well as some of the reprogramming TFs (*PDX1*,  
392 *NEUROG3*, *NKX2-2*) were higher in 5TF as compared to PNM (Fig. 3A). On the other  
393 hand, several genes associated with a mature  $\beta$ -cell phenotype were more upregulated  
394 by 5TF than PNM (*PCSK1*, *ABCC8*, *KCNJ11*, *GLP1R*, *GIPR*, *NCAM1*, *CXCR4*), whilst  
395 others (*CHGB*, *PTPRN*, *CX36*) were induced to similar extents by both TF  
396 combinations (Fig. 3B). In line with loss of GCG activation, the pro-convertase gene  
397 *PCSK2*, which is expressed at higher levels in  $\alpha$  than  $\beta$  cells<sup>40</sup>, was reduced by 5TF as  
398 compared to PNM (Fig.3B), supporting that sequential introduction of Pax4 and Nkx2-2  
399 after PNM endorses the  $\beta$ -cell differentiation program in human fibroblasts. It should be  
400 noted that expression levels of the induced genes were lower than in human islets, with

401 differences ranging from 2-fold for *NCAM1* to 20,000-fold for *CHGB* (Fig. 3A,B, Table  
402 S1). Gene activation was sustained for at least eleven additional days under the same  
403 culture conditions despite declined expression of the reprogramming factor transgenes.  
404 Moreover, expression of some genes increased with time in culture (i.e. *NKX6.1*,  
405 *INSM1*, *ABCC8*, *CHGB*) (Fig.S3).

406 Lastly, we looked into genes that are selectively repressed (disallowed) in  $\beta$  cells<sup>41</sup>. In  
407 response to 5TF, several  $\beta$ -cell disallowed genes were significantly downregulated  
408 reaching expression levels comparable to human islets (*OAT*, *SMAD3*, *PDGFRA*,  
409 *CXCL12*, *LDHA*), while others remained unchanged (*REST*, *IGFBP4*). Among the  
410 studied genes only *MCT1* was induced by 5TF relative to parental HFF1 cells (Fig.3C).

411 Together, these results reveal that 5TF induces a transcriptional switch from a  
412 fibroblastic to a  $\beta$ -like cell identity that entails both selective gene activation and  
413 repression events. Hereafter, we will refer to cells generated following the 5TF protocol  
414 as induced  $\beta$ -like (i $\beta$ -like) cells.

#### 415 **In vitro assessment of human fibroblast-derived i $\beta$ -like cells.**

416 Glucose-induced insulin secretion (GSIS) by  $\beta$  cells is mediated by glucose  
417 metabolism, closure of ATP-dependent potassium channels, membrane depolarization  
418 and opening of voltage-dependent calcium channels, resulting in an increase in  
419 cytosolic  $Ca^{2+}$  that triggers insulin exocytosis. We investigated whether i $\beta$ -like cells  
420 exhibited  $\beta$ -cell functional features *in vitro* and begun by determining their ability to  
421 increase intracellular  $Ca^{2+}$  in response to glucose and membrane depolarization elicited  
422 by high potassium. We found that 65% of the cells exhibited a response to glucose,  
423 high potassium, or both whilst 35% of cells were unresponsive to either stimulus (Fig.  
424 4A and video S1). Parental HFF1 cells not engineered for 5TF expression were  
425 universally unresponsive to these stimuli (Fig. 4B and video S2). Among responsive  
426 cells, approximately half responded to both glucose and high potassium and half



427 responded only to potassium (Fig. 4A). We observed heterogeneity in the amplitude  
428 and kinetics of responses among individual cells (Fig. 4C). Next, we performed static  
429 incubation assays to study glucose-induced insulin secretion (GSIS) and found that i $\beta$ -  
430 like cells released similar amounts of human insulin at low (2mM) and high (20mM)  
431 glucose concentrations (Fig.4D). Thus, at this stage, i $\beta$ -like cells lack a key signature  
432 feature of normal  $\beta$ -cells, the ability to increase insulin secretion in response to  
433 changes in extracellular glucose.

434 The differentiation and functionality of many cell types vary dramatically between three-  
435 dimensional (3D) and two-dimensional (2D) monolayer cultures, the former being  
436 closer to the natural 3D microenvironment of cells in a living organism. Considering  
437 this, we reasoned that moving from the planar cell culture to a 3D system grown in  
438 suspension might improve the functionality of i $\beta$ -like cells. To test this, we generated  
439 spheroids of 1 200-1 800 i $\beta$ -like cells (average diameter of spheroids were  $128\pm 27$   $\mu$ m)  
440 one day after introduction of Nkx2-2 and maintained them in culture for three additional  
441 days (Fig.5A). Insulin protein was readily detected by immunostaining (Fig. 5B).  
442 Further, i $\beta$ -like cell spheroids presented higher transcript levels for several  $\beta$ -cell  
443 maturation markers including *INS*, the prohormone convertase *PCSK1*, and the ATP-  
444 dependent potassium channel subunits *KCNJ11* and *ABCC8*, as compared to i $\beta$ -like  
445 cells maintained in 2D cultures (Fig.5C). Consequently, the differences in expression  
446 levels with human islets were reduced (Table S2). Consistent with improved  
447 maturation; i $\beta$ -like cell spheroids exhibited a moderate but significant insulin secretory  
448 response to glucose (fold 20mM/2mM:  $2.02\pm 0.18$ ) as compared to 2D cultures (fold  
449 20mM/2mM:  $1.08\pm 0.15$ ) in static GSIS assays (Fig. 5D,E). Similar results were  
450 obtained using a different preparation of human foreskin fibroblasts (Fig. S4).  
451 Therefore, three-dimensional culture during the last stage of the 5TF reprogramming  
452 protocol (note that total length of the protocol remained unchanged) improved i $\beta$ -like  
453 cell function

454

455 To establish the glucose threshold for stimulation of insulin secretion, i $\beta$ -like cell  
456 clusters were subjected to either 2,5,11 or 20mM glucose. Although there was some  
457 variability, when moved from 2mM to 5mM glucose, cells did not show a statistical  
458 significant increase in insulin secretion (Fig. 5F). They increased insulin secretion on  
459 average by a factor of 2.3 when moved from 2mM to 11mM or to 20mM glucose (Fig.  
460 5F). These observations indicate that i $\beta$ -like cells are stimulated at higher glucose  
461 threshold. Remarkably, this concentration dependence of insulin secretion is similar to  
462 human islets that have a threshold at 3mM and a maximal response at 15mM<sup>39</sup>. In  
463 light of these results, we asked whether i $\beta$ -like cells presented recognizable secretory  
464 granules. Therefore, i $\beta$ -like cell clusters were fixed and prepared for conventional  
465 electron microscopy. The presence of multiple spherical electron-dense prototypical  
466 secretory vesicles was evident in most cells (Fig. 5G). These vesicles showed a high  
467 degree of morphological heterogeneity, presumably as consequence of their degree of  
468 maturation and/or loading. Although they did not have the appearance of typical  
469 insulin-containing granules from primary  $\beta$  cells, which are characterized by a clear  
470 halo surrounding a dark polygonal dense core<sup>42</sup>, some of the vesicles exhibited a grey  
471 or less electron dense halo and looked similar to the granules described in insulin-  
472 positive cells generated from stem cells in original differentiation protocols<sup>10,43</sup>.

473

#### 474 **In vivo assessment of human fibroblast-derived i $\beta$ -like cells.**

475 Lastly, we studied the maintenance of cellular reprogramming *in vivo*. To this end, we  
476 transplanted 300 i $\beta$ -like cell spheroids (1000 cells/spheroid) into the anterior chamber  
477 of the eye (ACE) of immune-deficient NOD *scid* gamma (NSG) mice (Fig. 6A,B). The  
478 ACE allows fast engraftment<sup>44</sup> and *in vivo* imaging<sup>45</sup>. To assess *in vivo* graft  
479 revascularization we used two-photon microscopy after injection of RITC-dextran and  
480 confirmed the presence of functional vessels in the grafts 10 days after transplantation

481 (Fig. 6C and video S1). We also established that the transplanted cells were viable by  
482 visualizing fluorescence of the long-term tracer CFDA (Fig. 6C). We then investigated  
483 whether reprogramming was retained in vivo. We first studied human *INS* gene  
484 expression in eye grafts harvested ten days after transplantation. As shown in Figure  
485 6D, human *INS* transcripts were readily detectable and levels (expressed relative to  
486 *TBP*) were similar to those exhibited by  $\beta$ -like cells prior to transplantation (Fig.2A, Fig.  
487 5C). Corroborating this result, there were abundant HLA+ (human cell marker) cells  
488 that stained for C-peptide and for the transcription factors PDX1, NKX2-2 and MAFA,  
489 which are produced from both viral transgenes and cellular genes, in the eye grafts  
490 (Fig. 6E and Fig. S5). Of the total number of HLA+ cells counted,  $43.5 \pm 2.7\%$  were also  
491 positive for C-peptide (Fig. 6F). In addition, thirty minutes after an intra-peritoneal  
492 glucose injection, human insulin was readily detectable in the aqueous humor of the  
493 eyes carrying  $\beta$ -like cell grafts (17 of 17, ranging from 11 to 158 mU/L), whereas no  
494 insulin was detected in eyes transplanted with non-engineered fibroblast clusters or in  
495 mice that received no transplants (Fig.6G). Average insulin levels achieved with 300  $\beta$ -  
496 like cells were around 10-fold lower than those observed with 150-200 human islets  
497 ( $53 \pm 11$  mU/L as compared to  $688 \pm 99$  mU/L) (Fig. 6G). Together, these data confirm  
498 that cellular reprogramming persisted after transplantation.

499 Finally, to evaluate  $\beta$ -like cell function in vivo, approximately 4000 spheroids were  
500 loaded onto a collagen disk and deposited subcutaneously into the abdominal cavity of  
501 adult NSG mice. We detected low levels of circulating human insulin after a glucose  
502 challenge in 3 (of 3) and 2 (of 3) mice at days 15 and 30 post-transplantation,  
503 respectively (Fig. 6H). We repeated this experiment using the well-vascularized  
504 omentum as implant site and observed overall higher human insulin levels and  
505 significant glucose-stimulated insulin secretion at day 30 post-transplantation in 3 (of 3)  
506 mice (Fig. 6H). Together, these results demonstrate that  $\beta$ -like cells exhibit glucose-  
507 induced insulin secretion in vivo. Remarkably, glucose-induced plasma human insulin

508 levels observed in mice transplanted with 4000 i $\beta$ -like cell spheroids were in the same  
509 order of magnitude than mice transplanted with a total of 300-500 human islets into the  
510 ACE (Fig. 6H). Thus, correlating with determinations in the aqueous humor, these  
511 results reveal that i $\beta$ -like cell clusters secrete *in vivo* approximately one tenth of the  
512 amount of insulin released by human islets.

## 513 **DISCUSSION**

514 In this study, we have developed a 10-day long protocol to produce insulin-producing  
515 cells from human fibroblasts through sequential introduction of five lineage-determining  
516 transcription factors. Enforced expression of PNM+Pax4+Nkx2-2 results in concomitant  
517 activation of the  $\beta$ -cell and down-regulation of the fibroblastic transcriptional programs.  
518 Significantly, reprogrammed cells exhibit a functional  $\beta$ -cell like phenotype as judged by  
519 their expression of critical  $\beta$ -cell function genes and their ability to mobilize calcium and  
520 secrete insulin upon glucose stimulation. These findings warrant further investigations  
521 on TF-based reprogramming strategies to generate  $\beta$ -like cells from human fibroblasts.

522 When compared to other published TF-based reprogramming examples, i $\beta$ -like cells  
523 exhibited *INS* transcript levels similar to those of reprogrammed human pancreatic duct  
524 cells<sup>20</sup> and remarkably higher than those reached in human hepatocytes<sup>46</sup>. Still,  
525 expression levels of insulin and of other  $\beta$ -cell marker genes were lower than in human  
526 islets. Likewise, glucose-induced insulin secretion was modest, especially in terms of  
527 the amount of hormone secreted. We expect further progress by redefining culture  
528 conditions as it has been done in stem cell derivation protocols for more than a decade  
529<sup>7, 10, 43, 47-52</sup>. For example here we report that, by merely moving from 2D to a 3D culture  
530 system, i $\beta$ -like cells acquired the ability to secrete insulin in response to glucose.  
531 Another simple strategy to improve the functionality of i $\beta$ -like cells would be the  
532 addition of soluble factors during or after introduction of the conversion TFs<sup>38, 53, 54</sup>.  
533 Some of these factors might be selected from the growing body of information on

534 molecules that enhance maturation of  $\beta$  cells generated from stem cells <sup>55</sup>.  
535 Interestingly, it has been shown that soluble molecules can even substitute the function  
536 of exogenous factors in some reprogramming protocols <sup>56-58</sup>.

537 The use of skin fibroblasts as cell source in place of other less accessible cell lineages  
538 can facilitate clinical translation of this approach. Furthermore, the prospect of auto-  
539 transplantation and the avoidance of tumor-related concerns linked to pluripotent cell  
540 states are two additional assets of this type of direct reprogramming approaches. Here  
541 we show that i $\beta$ -like cell grafts are efficiently re-vascularized, viable and exhibit  
542 glucose-induced insulin secretion in vivo. Circulating human insulin levels in mice  
543 transplanted with i $\beta$ -like cells were lower but not far-off from those reported in  
544 publications using stem cell-derived insulin-producing cells (Table S2). Together, these  
545 results provide the foundation for further work aimed at evaluating the long-term  
546 function of transplanted i $\beta$ -like cell spheroids under pathophysiological contexts. It will  
547 be interesting to assess whether the in vivo environment aids in the maturation process  
548 of i $\beta$ -like cells as it has been reported for stem cell-derived  $\beta$  cell progenitors <sup>49, 52</sup>.

549 In summary, our results demonstrate that it is possible to generate insulin-producing  
550 cells from human fibroblasts using lineage specific transcription factors. This work  
551 evidences the feasibility of direct lineage reprogramming to generate  $\beta$ -like cells from  
552 developmentally distant cell lineages. The relative technical simplicity and speed of this  
553 procedure together with the opportunity to generate patient-specific  $\beta$  cells for disease  
554 modeling and/or autologous transplantation warrants a more comprehensive evaluation  
555 of this approach in the future.

556

557 **ACKNOWLEDGEMENTS**

558 We are indebted to Lidia Sanchez, Yaiza Esteban (IDIBAPS, CIBERDEM) and Nawelle  
559 Dogheche (IDIBAPS) for their help in specific experiments, to Anna Soler (Hospital  
560 Clinic) for karyotyping the reprogrammed cells, and to Chris Newgard and Hans  
561 Hohmeier (Duke University) for critical reading of the manuscript. We thank the  
562 Advanced Optical Microscopy and the Electronic Microscopy Units of the Technological  
563 Centers of the University of Barcelona (CCiTUB for their help in sample processing  
564 and analyses. The monoclonal antibodies against C-peptide and Nkx2-2 were obtained  
565 from the Developmental Studies Hybridoma Bank developed under the auspices of the  
566 NICHD and maintained by The University of Iowa. This work has been supported by  
567 grant PI19/00896 (to R Ga, R Go) integrated in the Plan Estatal de I+D+I and cofinanced  
568 by ISCIII-Subdirección General de Evaluación and Fondo Europeo de Desarrollo  
569 Regional (FEDER-"A way to build Europe"), grants 120230 (to R Ga) and 121430/31/32  
570 (to NM) from La Fundació La Marató de TV3, grant EFSF/JDRF/Lilly Type 1  
571 Programme 2017 (to R Ga) from the European Foundation for the Study of Diabetes,  
572 grants 2017 SGR 1166 (to JV) and 2017 SGR 1306 (to NM) from the Generalitat de  
573 Catalunya, by the Fundación DiabetesCERO and by the Cátedra Astra Zeneca. The  
574 research leading to these results has received funding from the European Community's  
575 Seventh Framework Programme (FP7/2009-2013) under the grant agreement  
576 n°229673 (SC) and from the European Research Council under the European Union's  
577 Horizon 2020 research and innovation programme-StG-2014-640525\_REGMAMKID  
578 (NM). CIBERDEM (Centro de Investigación Biomédica en Red de Diabetes y  
579 Enfermedades Metabólicas Asociadas) is an initiative of the Instituto de Salud Carlos  
580 III.

## 581 **AUTHOR CONTRIBUTIONS**

582 Conceived and designed the experiments: MF, R Ga. Performed the experiments: MF,  
583 AG, EP, NT, HF, RFR, SC. Provided human islets: CB, AW. Provided materials: LC,

584 JR, NM, AN. Analyzed and discussed the data: MF, CE, JV, RGo, RGa. Wrote the  
585 manuscript: MF, RGa.

## 586 CONFLICT OF INTEREST

587 Authors declare no conflict of interest

## 588 REFERENCES

- 589 1. Takahashi K, Tanabe K, Ohnuki M, Narita M, Ichisaka T, Tomoda K, *et al.*  
590 Induction of pluripotent stem cells from adult human fibroblasts by defined  
591 factors. *Cell* 2007, **131**(5): 861-872.  
592
- 593 2. Takahashi K, Yamanaka S. Induction of pluripotent stem cells from mouse  
594 embryonic and adult fibroblast cultures by defined factors. *Cell* 2006, **126**(4):  
595 663-676.  
596
- 597 3. Graf T. Historical origins of transdifferentiation and reprogramming. *Cell stem*  
598 *cell* 2011, **9**(6): 504-516.  
599
- 600 4. Vierbuchen T, Wernig M. Molecular roadblocks for cellular reprogramming.  
601 *Molecular cell* 2012, **47**(6): 827-838.  
602
- 603 5. Xu J, Du Y, Deng H. Direct lineage reprogramming: strategies, mechanisms,  
604 and applications. *Cell stem cell* 2015, **16**(2): 119-134.  
605
- 606 6. Yamanaka S. A fresh look at iPS cells. *Cell* 2009, **137**(1): 13-17.  
607
- 608 7. D'Amour KA, Agulnick AD, Eliazer S, Kelly OG, Kroon E, Baetge EE. Efficient  
609 differentiation of human embryonic stem cells to definitive endoderm. *Nature*  
610 *biotechnology* 2005, **23**(12): 1534-1541.  
611
- 612 8. Kroon E, Martinson LA, Kadoya K, Bang AG, Kelly OG, Eliazer S, *et al.*  
613 Pancreatic endoderm derived from human embryonic stem cells generates  
614 glucose-responsive insulin-secreting cells in vivo. *Nature biotechnology* 2008,  
615 **26**(4): 443-452.  
616
- 617 9. Maehr R, Chen S, Snitow M, Ludwig T, Yagasaki L, Goland R, *et al.* Generation  
618 of pluripotent stem cells from patients with type 1 diabetes. *Proceedings of the*  
619 *National Academy of Sciences of the United States of America* 2009, **106**(37):  
620 15768-15773.  
621
- 622 10. Pagliuca FW, Millman JR, Gurtler M, Segel M, Van Dervort A, Ryu JH, *et al.*  
623 Generation of functional human pancreatic beta cells in vitro. *Cell* 2014, **159**(2):  
624 428-439.  
625
- 626 11. Rezanian A, Bruin JE, Arora P, Rubin A, Batushansky I, Asadi A, *et al.* Reversal  
627 of diabetes with insulin-producing cells derived in vitro from human pluripotent  
628 stem cells. *Nature biotechnology* 2014, **32**(11): 1121-1133.  
629

- 630 12. Johnson JD. The quest to make fully functional human pancreatic beta cells  
631 from embryonic stem cells: climbing a mountain in the clouds. *Diabetologia*  
632 2016, **59**(10): 2047-2057.  
633
- 634 13. Kushner JA, MacDonald PE, Atkinson MA. Stem cells to insulin secreting cells:  
635 two steps forward and now a time to pause? *Cell stem cell* 2014, **15**(5): 535-  
636 536.  
637
- 638 14. Zhou Q, Brown J, Kanarek A, Rajagopal J, Melton DA. In vivo reprogramming  
639 of adult pancreatic exocrine cells to beta-cells. *Nature* 2008, **455**(7213): 627-  
640 632.  
641
- 642 15. Ariyachet C, Tovaglieri A, Xiang G, Lu J, Shah MS, Richmond CA, *et al.*  
643 Reprogrammed Stomach Tissue as a Renewable Source of Functional beta  
644 Cells for Blood Glucose Regulation. *Cell stem cell* 2016, **18**(3): 410-421.  
645
- 646 16. Chen YJ, Finkbeiner SR, Weinblatt D, Emmett MJ, Tameire F, Yousefi M, *et al.*  
647 De novo formation of insulin-producing "neo-beta cell islets" from intestinal  
648 crypts. *Cell reports* 2014, **6**(6): 1046-1058.  
649
- 650 17. Furuyama K, Chera S, van Gorp L, Oropeza D, Ghila L, Damond N, *et al.*  
651 Diabetes relief in mice by glucose-sensing insulin-secreting human alpha-cells.  
652 *Nature* 2019.  
653
- 654 18. Gasa R, Mrejen C, Leachman N, Otten M, Barnes M, Wang J, *et al.*  
655 Proendocrine genes coordinate the pancreatic islet differentiation program in  
656 vitro. *Proceedings of the National Academy of Sciences of the United States of*  
657 *America* 2004, **101**(36): 13245-13250.  
658
- 659 19. Heremans Y, Van De Casteele M, in't Veld P, Gradwohl G, Serup P, Madsen O,  
660 *et al.* Recapitulation of embryonic neuroendocrine differentiation in adult human  
661 pancreatic duct cells expressing neurogenin 3. *The Journal of cell biology* 2002,  
662 **159**(2): 303-312.  
663
- 664 20. Lee J, Sugiyama T, Liu Y, Wang J, Gu X, Lei J, *et al.* Expansion and conversion  
665 of human pancreatic ductal cells into insulin-secreting endocrine cells. *eLife*  
666 2013, **2**: e00940.  
667
- 668 21. Yechoor V, Liu V, Espiritu C, Paul A, Oka K, Kojima H, *et al.* Neurogenin3 is  
669 sufficient for transdetermination of hepatic progenitor cells into neo-islets in vivo  
670 but not transdifferentiation of hepatocytes. *Developmental cell* 2009, **16**(3): 358-  
671 373.  
672
- 673 22. Ieda M, Fu JD, Delgado-Olguin P, Vedantham V, Hayashi Y, Bruneau BG, *et al.*  
674 Direct reprogramming of fibroblasts into functional cardiomyocytes by defined  
675 factors. *Cell* 2010, **142**(3): 375-386.  
676
- 677 23. Hiramatsu K, Sasagawa S, Outani H, Nakagawa K, Yoshikawa H, Tsumaki N.  
678 Generation of hyaline cartilaginous tissue from mouse adult dermal fibroblast  
679 culture by defined factors. *The Journal of clinical investigation* 2011, **121**(2):  
680 640-657.  
681
- 682 24. Vierbuchen T, Ostermeier A, Pang ZP, Kokubu Y, Sudhof TC, Wernig M. Direct  
683 conversion of fibroblasts to functional neurons by defined factors. *Nature* 2010,  
684 **463**(7284): 1035-1041.



- 685  
686 25. Najm FJ, Lager AM, Zaremba A, Wyatt K, Caprariello AV, Factor DC, *et al.*  
687 Transcription factor-mediated reprogramming of fibroblasts to expandable,  
688 myelinogenic oligodendrocyte progenitor cells. *Nature biotechnology* 2013,  
689 **31**(5): 426-433.  
690  
691 26. Zhu S, Russ HA, Wang X, Zhang M, Ma T, Xu T, *et al.* Human pancreatic beta-  
692 like cells converted from fibroblasts. *Nature communications* 2016, **7**: 10080.  
693  
694 27. Pennarossa G, Maffei S, Campagnol M, Tarantini L, Gandolfi F, Brevini TA.  
695 Brief demethylation step allows the conversion of adult human skin fibroblasts  
696 into insulin-secreting cells. *Proceedings of the National Academy of Sciences of*  
697 *the United States of America* 2013, **110**(22): 8948-8953.  
698  
699 28. Pereyra-Bonnet F, Gimeno ML, Argumedo NR, Ielpi M, Cardozo JA, Gimenez  
700 CA, *et al.* Skin fibroblasts from patients with type 1 diabetes (T1D) can be  
701 chemically transdifferentiated into insulin-expressing clusters: a transgene-free  
702 approach. *PloS one* 2014, **9**(6): e100369.  
703  
704 29. Akinci E, Banga A, Tungatt K, Segal J, Eberhard D, Dutton JR, *et al.*  
705 Reprogramming of various cell types to a beta-like state by Pdx1, Ngn3 and  
706 MafA. *PloS one* 2013, **8**(11): e82424.  
707  
708 30. Katz LS, Geras-Raaka E, Gershengorn MC. Reprogramming adult human  
709 dermal fibroblasts to islet-like cells by epigenetic modification coupled to  
710 transcription factor modulation. *Stem cells and development* 2013, **22**(18):  
711 2551-2560.  
712  
713 31. Broca C, Varin E, Armanet M, Turrel-Cuzin C, Bosco D, Dalle S, *et al.*  
714 Proteasome dysfunction mediates high glucose-induced apoptosis in rodent  
715 beta cells and human islets. *PloS one* 2014, **9**(3): e92066.  
716  
717 32. Lynn FC, Sanchez L, Gomis R, German MS, Gasa R. Identification of the bHLH  
718 factor Math6 as a novel component of the embryonic pancreas transcriptional  
719 network. *PloS one* 2008, **3**(6): e2430.  
720  
721 33. Bartholomeus K, Jacobs-Tulleneers-Thevissen D, Shouyue S, Suenens K, In't  
722 Veld PA, Pipeleers-Marichal M, *et al.* Omentum is better site than kidney  
723 capsule for growth, differentiation, and vascularization of immature porcine  
724 beta-cell implants in immunodeficient rats. *Transplantation* 2013, **96**(12): 1026-  
725 1033.  
726  
727 34. Figueiredo H, Figueroa ALC, Garcia A, Fernandez-Ruiz R, Broca C,  
728 Wojtuszczyz A, *et al.* Targeting pancreatic islet PTP1B improves islet graft  
729 revascularization and transplant outcomes. *Science translational medicine*  
730 2019, **11**(497).  
731  
732 35. Li W, Nakanishi M, Zumsteg A, Shear M, Wright C, Melton DA, *et al.* In vivo  
733 reprogramming of pancreatic acinar cells to three islet endocrine subtypes.  
734 *eLife* 2014, **3**: e01846.  
735  
736 36. Granio O, Porcherot M, Corjon S, Kitidee K, Henning P, Eljaafari A, *et al.*  
737 Improved adenovirus type 5 vector-mediated transduction of resistant cells by  
738 piggybacking on coxsackie B-adenovirus receptor-pseudotyped baculovirus.  
739 *Journal of virology* 2009, **83**(12): 6048-6066.

- 740  
741 37. Toh ML, Hong SS, van de Loo F, Franqueville L, Lindholm L, van den Berg W,  
742 *et al.* Enhancement of adenovirus-mediated gene delivery to rheumatoid  
743 arthritis synoviocytes and synovium by fiber modifications: role of arginine-  
744 glycine-aspartic acid (RGD)- and non-RGD-binding integrins. *Journal of*  
745 *immunology* 2005, **175**(11): 7687-7698.  
746  
747 38. Fontcuberta-PiSunyer M, Cervantes S, Miquel E, Mora-Castilla S, Laurent LC,  
748 Raya A, *et al.* Modulation of the endocrine transcriptional program by targeting  
749 histone modifiers of the H3K27me3 mark. *Biochimica et biophysica acta* 2018,  
750 **1861**(5): 473-480.  
751  
752 39. Tomaru Y, Hasegawa R, Suzuki T, Sato T, Kubosaki A, Suzuki M, *et al.* A  
753 transient disruption of fibroblastic transcriptional regulatory network facilitates  
754 trans-differentiation. *Nucleic acids research* 2014, **42**(14): 8905-8913.  
755  
756 40. Ramzy AK, T.J. Revisiting Proinsulin Processing: Evidence That Human  $\beta$ -Cells  
757 Process Proinsulin With Prohormone Convertase (PC) 1/3 but Not PC2.  
758 *Diabetes* 2020, **69**: 1451-1462.  
759  
760 41. Schuit FVL, J; Granvik, M; Goyvaerts, L; de Faudeur, Gd, Schraenen, A;  
761 Lemaire, K. b-Cell-Specific Gene Repression: A Mechanism to Protect Against  
762 Inappropriate or Maladjusted Insulin Secretion? *Diabetes* 2012, **61**: 969-975.  
763  
764 42. Brereton MF, Vergari E, Zhang Q, Clark A. Alpha-, Delta- and PP-cells: Are  
765 They the Architectural Cornerstones of Islet Structure and Co-ordination?  
766 *J Histochem Cytochem* 2015, **63**: 575-591.  
767  
768 43. D'Amour KA, Bang AG, Eliazer S, Kelly OG, Agulnick AD, Smart NG, *et al.*  
769 Production of pancreatic hormone-expressing endocrine cells from human  
770 embryonic stem cells. *Nature biotechnology* 2006, **24**(11): 1392-1401.  
771  
772 44. Adeghate E, Donath T. Morphological findings in long-term pancreatic tissue  
773 transplants in the anterior eye chamber of rats. *Pancreas* 1990, **5**(3): 298-305.  
774  
775 45. Leibiger IB, Berggren PO. Intraocular in vivo imaging of pancreatic islet cell  
776 physiology/pathology. *Molecular metabolism* 2017, **6**(9): 1002-1009.  
777  
778 46. Sapir T, Shternhall K, Meivar-Levy I, Blumenfeld T, Cohen H, Skutelsky E, *et al.*  
779 Cell-replacement therapy for diabetes: Generating functional insulin-producing  
780 tissue from adult human liver cells. *Proceedings of the National Academy of*  
781 *Sciences of the United States of America* 2005, **102**(22): 7964-7969.  
782  
783 47. Russ HA, Parent AV, Ringler JJ, Hennings TG, Nair GG, Shveygert M, *et al.*  
784 Controlled induction of human pancreatic progenitors produces functional beta-  
785 like cells in vitro. *The EMBO journal* 2015, **34**(13): 1759-1772.  
786  
787 48. Rezanian A, Bruin JE, Xu J, Narayan K, Fox JK, O'Neil JJ, *et al.* Enrichment of  
788 human embryonic stem cell-derived NKX6.1-expressing pancreatic progenitor  
789 cells accelerates the maturation of insulin-secreting cells in vivo. *Stem cells*  
790 2013, **31**(11): 2432-2442.  
791  
792 49. Rezanian A, Bruin JE, Riedel MJ, Mojibian M, Asadi A, Xu J, *et al.* Maturation of  
793 human embryonic stem cell-derived pancreatic progenitors into functional islets

- 794 capable of treating pre-existing diabetes in mice. *Diabetes* 2012, **61**(8): 2016-  
795 2029.
- 796
- 797 50. Liu H, Li R, Liao H-K, Min Z, Wang C, Yu Y, *et al.* Chemical combinations  
798 potentiate human pluripotent stem cell-derived 3D pancreatic progenitor  
799 clusters toward functional  $\beta$  cell. *Nature communications* 2021, **12**: 3330.
- 800
- 801 51. Hrvatin S, O'Donnell CW, Deng F, Millman JR, Pagliuca FW, Dilorio P, *et al.*  
802 Differentiated human stem cells resemble fetal, not adult, beta cells.  
803 *Proceedings of the National Academy of Sciences of the United States of*  
804 *America* 2014, **111**(8): 3038-3043.
- 805
- 806 52. Bruin JE, Rezanian A, Xu J, Narayan K, Fox JK, O'Neil JJ, *et al.* Maturation and  
807 function of human embryonic stem cell-derived pancreatic progenitors in  
808 macroencapsulation devices following transplant into mice. *Diabetologia* 2013,  
809 **56**(9): 1987-1998.
- 810
- 811 53. Liu ML, Zang T, Zou Y, Chang JC, Gibson JR, Huber KM, *et al.* Small  
812 molecules enable neurogenin 2 to efficiently convert human fibroblasts into  
813 cholinergic neurons. *Nature communications* 2013, **4**: 2183.
- 814
- 815 54. Zhu S, Li W, Zhou H, Wei W, Ambasudhan R, Lin T, *et al.* Reprogramming of  
816 human primary somatic cells by OCT4 and chemical compounds. *Cell stem cell*  
817 2010, **7**(6): 651-655.
- 818
- 819 55. Ma X, Zhu S. **Chemical strategies for pancreatic  $\beta$  cell differentiation,**  
820 **reprogramming, and regeneration.** *Acta Biochim Biophys Sin (Shanghai)*  
821 2017, **49**: 289-301.
- 822
- 823 56. Hu W, Qiu B, Guan W, Wang Q, Wang M, Li W, *et al.* Direct Conversion of  
824 Normal and Alzheimer's Disease Human Fibroblasts into Neuronal Cells by  
825 Small Molecules. *Cell stem cell* 2015, **17**(2): 204-212.
- 826
- 827 57. Li K, Zhu S, Russ HA, Xu S, Xu T, Zhang Y, *et al.* Small molecules facilitate the  
828 reprogramming of mouse fibroblasts into pancreatic lineages. *Cell stem cell*  
829 2014, **14**(2): 228-236.
- 830
- 831 58. Fu Y, Huang C, Xu X, Gu H, Ye Y, Jiang C, *et al.* Direct reprogramming of  
832 mouse fibroblasts into cardiomyocytes with chemical cocktails. *Cell research*  
833 2015, **25**(9): 1013-1024.
- 834
- 835

836

## 837 **FIGURE LEGENDS**

### 838 **Figure 1. Introduction of the PNM factors in human fibroblasts.**

839 Human foreskin fibroblasts (HFF1) were transduced with a polycistronic recombinant  
840 adenovirus encoding the transcription factors Pdx1, Neurog3, MafA and the reporter

841 protein Cherry (Ad-PNM). Untreated parental fibroblasts were used as controls  
842 (indicated as C in graphs). **(A)** Bright field images and Cherry immunofluorescence of  
843 control fibroblasts and fibroblasts infected with Ad-PNM at day 3 and 7 post-infection.  
844 Scale bar is 100  $\mu$ m. **(B)** qRT-PCR of adenovirus-encoded transgenes at day 3 (n=11)  
845 and 7 (n=6) after infection with Ad-PNM. **(C)** qRT-PCR of human *INS* at day 3 (n=7)  
846 and 7 (n=13) after infection with Ad-PNM. **(D)** In red, qRT-PCR of human *INS* in  
847 fibroblasts maintained in the indicated culture media during 7 days after infection with  
848 the indicated adenoviruses, (n=3-10). In blue, *INS* mRNA levels in iPSC-derived  $\beta$ -cells  
849 and in isolated human islets (n=10). **(E-F)** qRT-PCR of indicated genes encoding  
850 islet/ $\beta$ -cell transcription factors and islet hormones at day 7 post-PNM (n=8-15). **(G)**  
851 qRT-PCR for the indicated fibroblast markers at days 3 (n=5-11) and 7 post-PNM (n=5-  
852 6). In **B-F**, expression levels are expressed relative to *TBP*. In **G**, expression is relative  
853 to control fibroblasts, given the value of 1 (dotted line). Data are presented as the mean  
854  $\pm$  SEM for the number of samples indicated in parenthesis. \*,P<0.05; \*\*,P<0.01;  
855 \*\*\*,P<0.001, relative to control (untreated) fibroblasts or between indicated conditions  
856 using unpaired t-test (**B-E**) or one sample t-test (**G**).

857

858 **Figure 2. Sequential introduction of the PNM factors, Pax4 and Nkx2-2 (5 TF**  
859 **protocol) in human fibroblasts.**

860 **(A)** qRT-PCR for the indicated genes in HFF1 fibroblasts infected with different  
861 combinations of the indicated adenoviruses. Pax4 was added three days after PNM.  
862 Nkx2-2 was added three days (PNM+Nkx2-2) or six days (PNM+Pax4+Nkx2-2) after  
863 PNM. Expression levels are calculated relative to *TBP* (n=4-12). **(B)** Scheme of the  
864 final 5TF reprogramming protocol showing the sequence of addition of adenoviruses  
865 encoding the indicated transcription factor/s. Duration of incubation with each  
866 adenovirus is represented with a line. Cells were studied at days 9-10 after initial  
867 addition of Ad-PNM. **(C)** Representative bright field image of parental fibroblasts and  
868 5TF reprogrammed fibroblasts at day 10. **(D)** Cell proliferation measured by BrdU

869 incorporation (n=3) and **(E)** Cell viability measured by MTT assay (n=3) in untreated  
870 control (in black) and 5TF-reprogrammed fibroblasts (in red) at the indicated days. Day  
871 4 values are before Pax4 introduction. **(F-G)** Representative immunofluorescence  
872 images showing Insulin and C-peptide staining (in red) in untreated fibroblasts and in  
873 fibroblasts infected with Ad-PNM alone or with 5TF. Nuclei were stained with Hoechst  
874 (in blue). Scale bar is 25  $\mu$ m. Data are presented as the mean  $\pm$  SEM for the number of  
875 experiments indicated in parenthesis \*,P<0.05; \*\*,P<0.01; \*\*\*,P<0.001, P<0.0001  
876 relative to PNM (in **A**) or to control fibroblasts (**D,E**) using one-way ANOVA (**A**), one-  
877 sample t-test (**D**) or unpaired t-test (**E**).

878

879 **Figure 3. 5FT protocol promotes  $\beta$ -cell specific gene activation and repression**  
880 **events in human fibroblasts.**

881 **(A,B)** qRT-PCR of islet/ $\beta$ -cell transcription factor **(A)** and  $\beta$ -cell function **(B)** genes in  
882 untreated control fibroblasts (n=5-19), in fibroblasts infected with Ad-PNM alone (n=3-  
883 20) or with 5TF (n=5-18) and in human islets (n=6-9). **(C)** qRT-PCR of  $\beta$ -cell  
884 disallowed genes in untreated control fibroblasts (n=5), in fibroblasts infected with 5TF  
885 (n=5-8) and in human islets (n=5). Expression levels were calculated relative to *TBP*.  
886 Values represent the mean  $\pm$  SEM for 5-14 for the number of n indicated in parenthesis  
887 \*, P< 0.05, \*\*, P< 0.01, \*\*\*, P< 0.001 between indicated bars using unpaired t-test.

888

889 **Figure 4. Functional characterization of  $i\beta$ -like cells generated with the 5TF**  
890 **protocol.**

891  $i\beta$ -like cells were loaded with the calcium indicator Fluo-4-AM at day 10 of the 5TF  
892 protocol. Single-cell imaging to detect cytosolic calcium was performed in the following  
893 sequence: low glucose (2mM, G2), high glucose (20mM, G20) and membrane  
894 depolarization with KCl 30mM. **(A)** Quantification of the frequency of cells (n=200, from  
895 6 independent reprogramming experiments) that responded to glucose, membrane

896 depolarization elicited by high potassium or both. Representative measurements of  
897 dynamic Fluo-4 fluorescence for **(B)** six single fibroblasts and **(C)** four single i $\beta$ -like  
898 cells. **(D)** In vitro insulin secretion by i $\beta$ -like cells. ELISA determination of secreted  
899 human insulin by control fibroblasts and i $\beta$ -like cells under non-stimulatory conditions  
900 (glucose 2mM) and stimulatory conditions (glucose 20 mM). Data are mean  $\pm$  SEM for  
901 6 independent reprogramming experiments.

902

903 **Figure 5. In vitro characterization of i $\beta$ -like cell spheroids.**

904 **(A)** Schematic representation of the modified 5TF protocol: cells were moved from 2D  
905 to 3D culture during the last three days (days 7-10) of the protocol. Bright field image of  
906 generated i $\beta$ -like cell spheroids. Scale bar is 100  $\mu$ m. **(B)** Representative  
907 immunofluorescence image showing C-peptide staining in red and nuclei in blue  
908 (marked with Hoechst) of an i $\beta$ -like cell spheroid at the end of the reprogramming  
909 protocol. Scale bar is 100  $\mu$ m. **(C)** qRT-PCR of the indicated genes in i $\beta$ -like cell  
910 spheroids (n=9-16). Transcript levels are expressed as fold relative to levels in i $\beta$ -like  
911 cells maintained in 2D culture throughout the 10-day protocol (given the value of 1,  
912 dotted line). **(D)** In vitro glucose-induced insulin secretion by i $\beta$ -like cell spheroids  
913 (n=14, from 8 reprogramming experiments). Secretion by control spheroids composed  
914 of parental fibroblasts (n= 5) is also shown. **(E)** Glucose secretory Index (fold-response  
915 20mM vs. 2mM glucose) of i $\beta$ -like cells maintained in 2D or in 3D (spheroids) cultures  
916 (n=16-18, from 8-10 reprogramming experiments). **(F)** Glucose dose curve of insulin  
917 secretion by i $\beta$ -like cell spheroids (n=4-12, 5 reprogramming experiments). **(G)**  
918 Conventional transmission electron microscopy showing a representative image of i $\beta$ -  
919 like cell spheroids. Prototypical electron dense secretory vesicles (asterisks) are  
920 observed dispersed in the cytoplasm. Well-preserved mitochondria (mit), endoplasmic  
921 reticulum (ER), Golgi membranes (G) and lipid droplets (LD) are also observed. Inset  
922 shows a detail of a secretory vesicle with an average diameter of 450nm. N, nucleus.

923 Scale bars are 200nm (inset) and 500nm. Data are presented as the mean  $\pm$  SEM for  
924 the number of experiments (n) indicated in parenthesis. \*, $P < 0.05$ ; \*\*, $P < 0.01$ ;  
925 \*\*\*, $P < 0.001$ , relative to 2D i $\beta$  cells **(C,E)**, or between glucose concentrations **(D,F)**  
926 using one sample t-test **(C)**, unpaired t test **(D, E)** or one-way ANOVA **(F)**.

927

## 928 **Figure 6. In vivo characterization of i $\beta$ -like cell spheroids.**

929 **(A)** Schematic representation of the transplantation of i $\beta$ -like cell spheroids into the  
930 anterior chamber of the eye (ACE) of immunodeficient NSG mice. **(B)** Image of an eye  
931 recently transplanted with 300 i $\beta$ -like cell spheroids (1000 cells/spheroid). **(C)**  
932 Vascularization of i $\beta$ -like cell aggregate grafts ten days following transplantation into  
933 the ACE. Representative in vivo image of functional vessels (RITC-dextran, red) and  
934 viable i $\beta$ -like cells (CFDA, green). Scale bar is 100  $\mu$ m. **(D)** qRT-PCR of human *TBP*  
935 and human *INS* transcripts in eyes of non-transplanted mice (n=3) and mice  
936 transplanted with fibroblast spheroids (n=3) or i $\beta$ -like cell spheroids (n=5) collected ten  
937 days post-transplantation. Human *TBP* expression is calculated relative to mouse *Tbp*  
938 and human *INS* relative to human *TBP*. **(E)** Representative immunofluorescence  
939 images showing HLA staining in red and C-peptide staining in green in i $\beta$ -like cell  
940 spheroid grafts ten days post-transplantation in NSG mice. Scale bar is 25  $\mu$ m. **(F)**  
941 Percentage of C-peptide+/HLA+ in eye grafts ten days after transplantation (n=5). **(G)**  
942 ELISA determination of human insulin in the aqueous humor after a glucose bolus in  
943 un-transplanted mice (n=7), in control mice transplanted with fibroblast spheroids  
944 (n=16) and in mice transplanted with i $\beta$ -like cell spheroids (n= 17) in the ACE at day 10  
945 post-transplantation; and in mice transplanted with 150-200 human islets (n=3) in the  
946 ACE at day 12-15 post-transplantation. **(H)** ELISA determination of human insulin in  
947 plasma, before and after a glucose challenge, at days 15 and 30 after transplantation  
948 of i $\beta$ -like cell spheroids subcutaneously (n=3) or in the omentum (n=3) of NSG mice.  
949 Each individual mouse is represented by a different color. Plasma human insulin levels

950 in non-transplanted animals (n=3), before and after glucose administration, and in  
951 animals transplanted with human islets in the ACE (n=5), after a glucose bolus, are  
952 provided for comparison purposes. Data are presented as mean  $\pm$  SEM. \*\*\*, P< 0.001  
953 using unpaired t-test.

954

955



**Figure 1**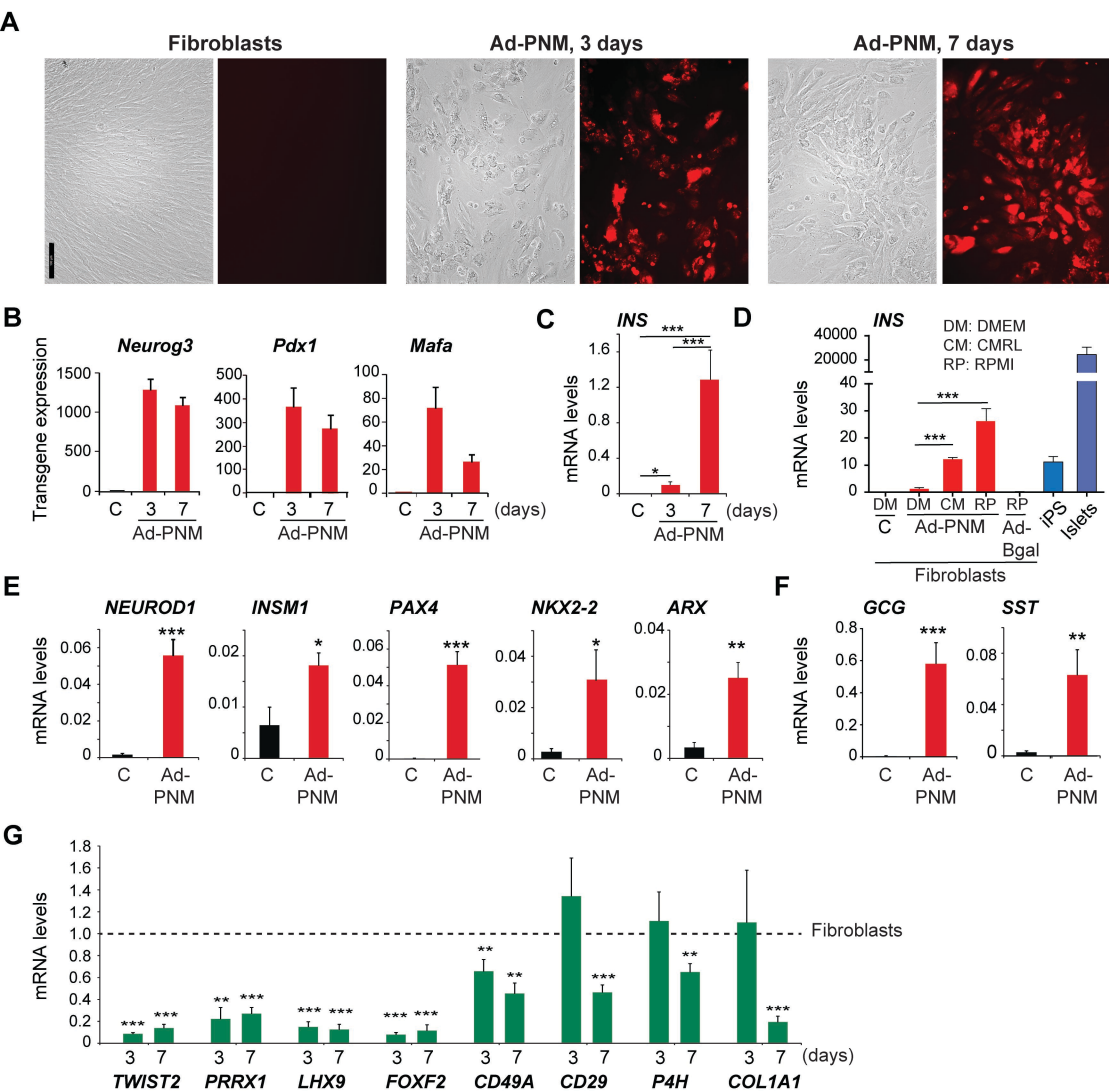

**Figure 2**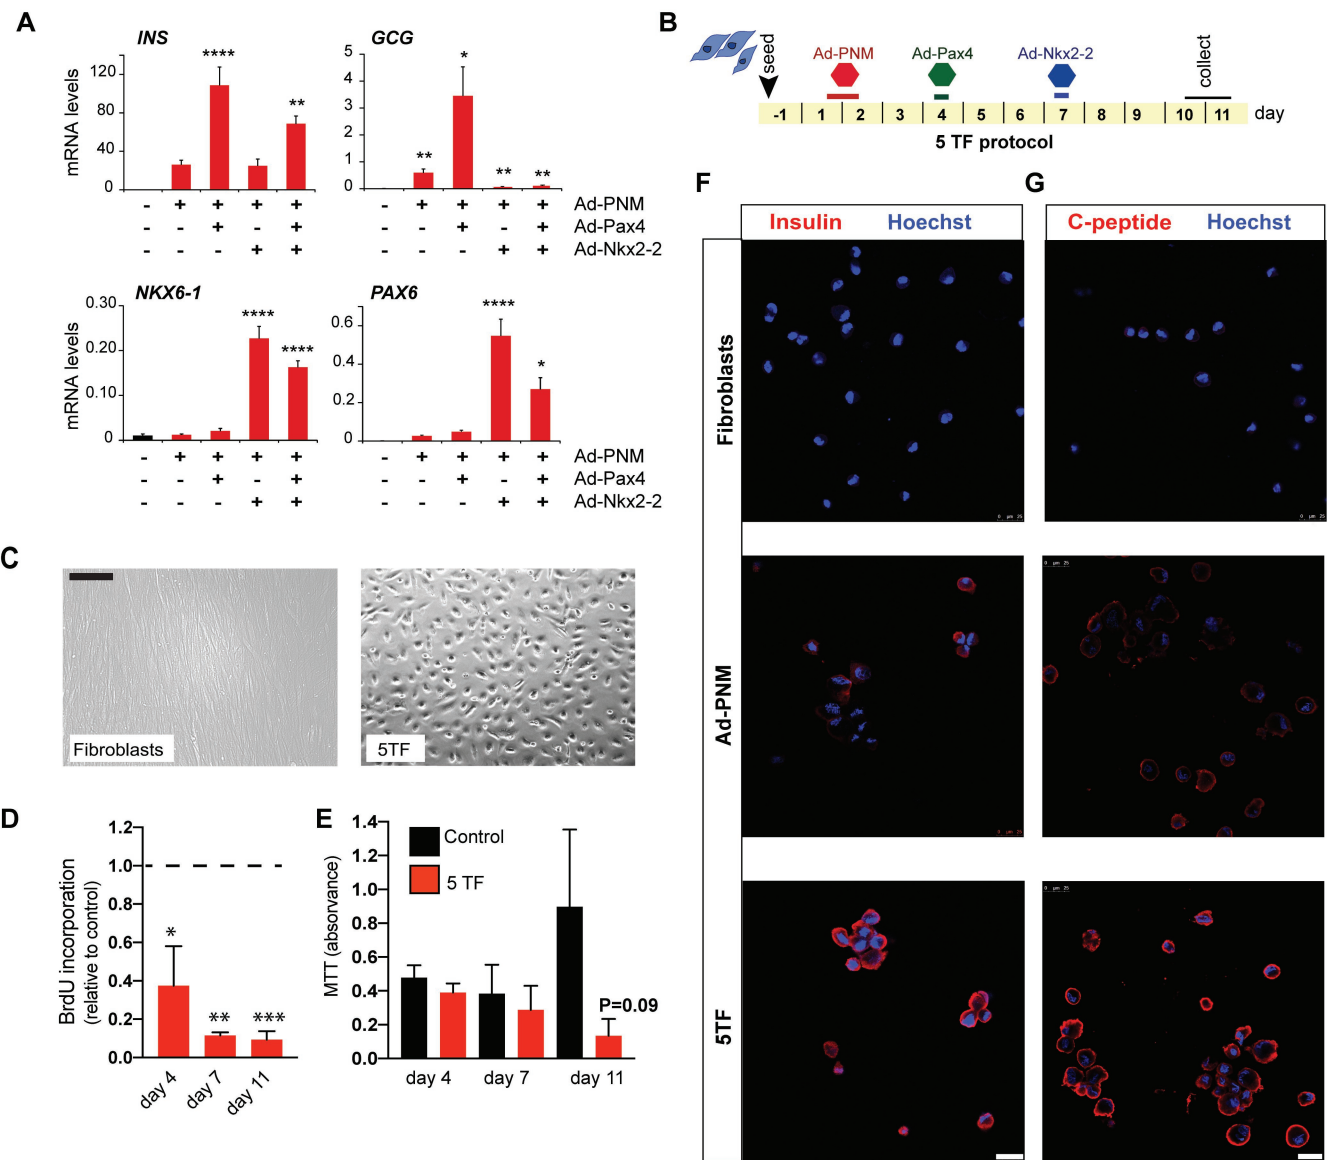

**Figure 3**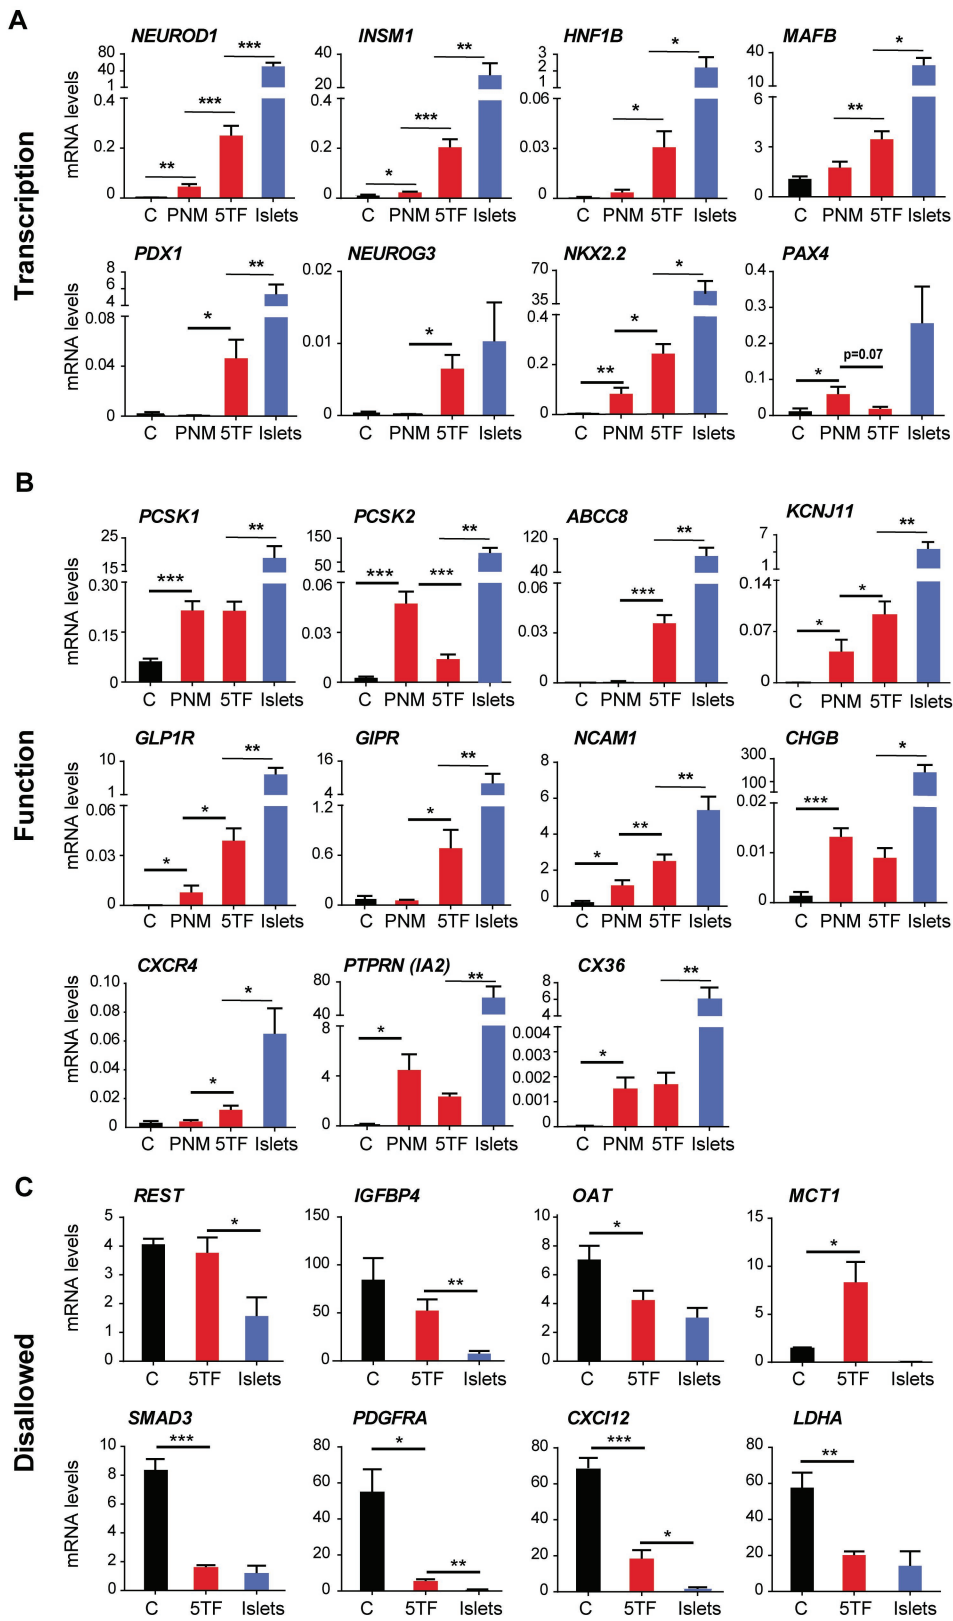

**Figure 4**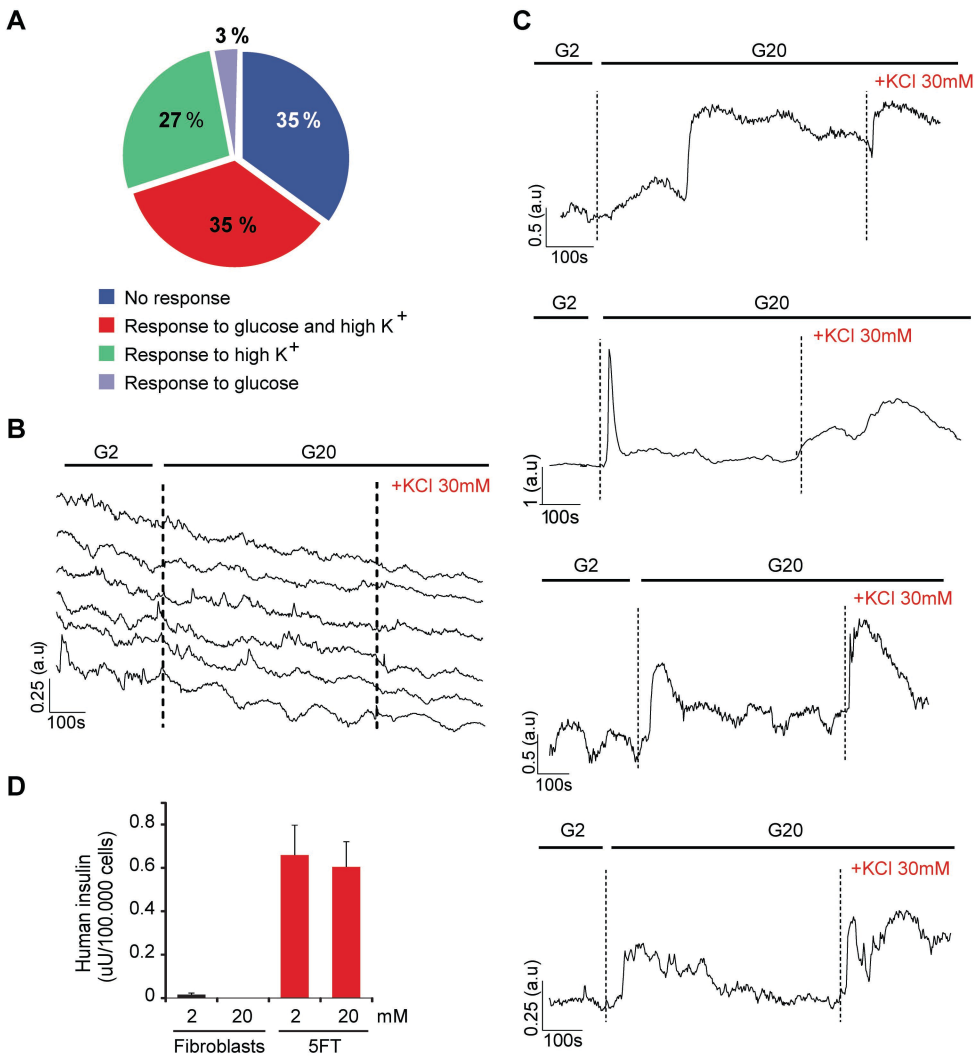

**Figure 5****A**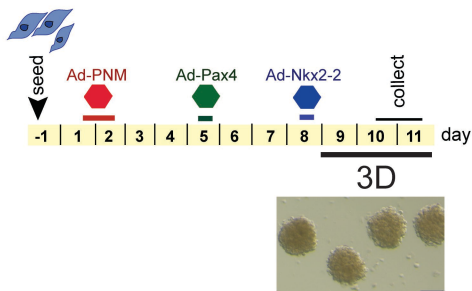**B**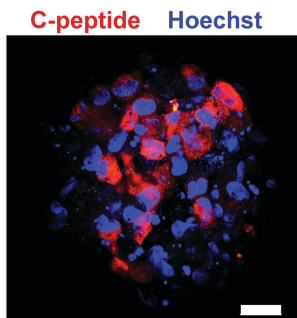**D**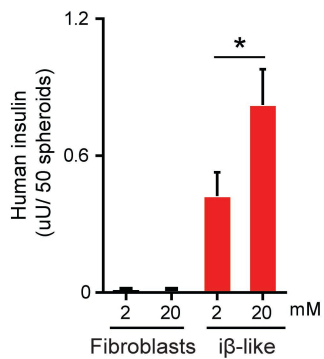**E**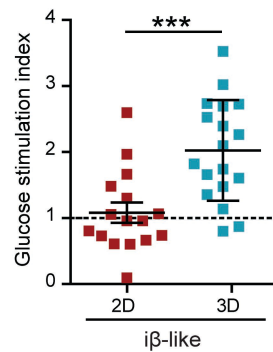**F**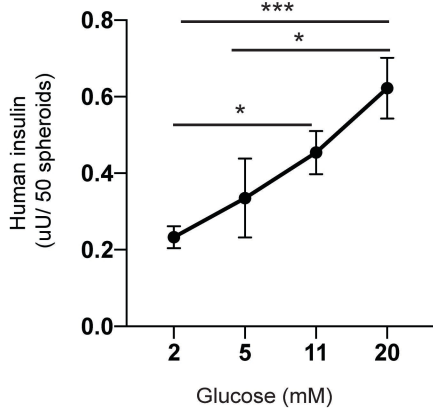**G**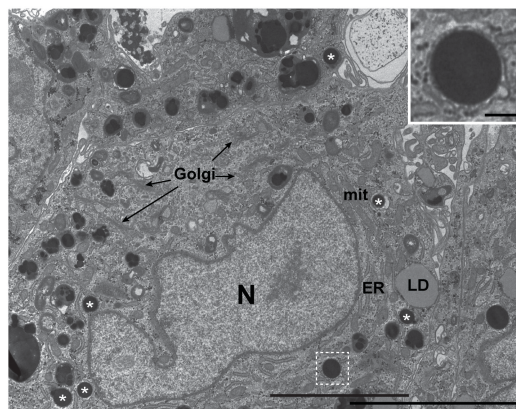**C**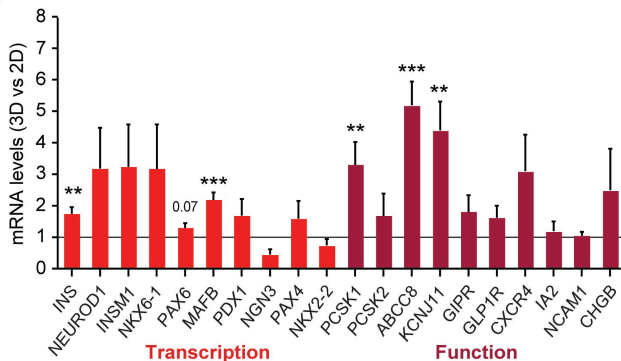

**Figure 6**

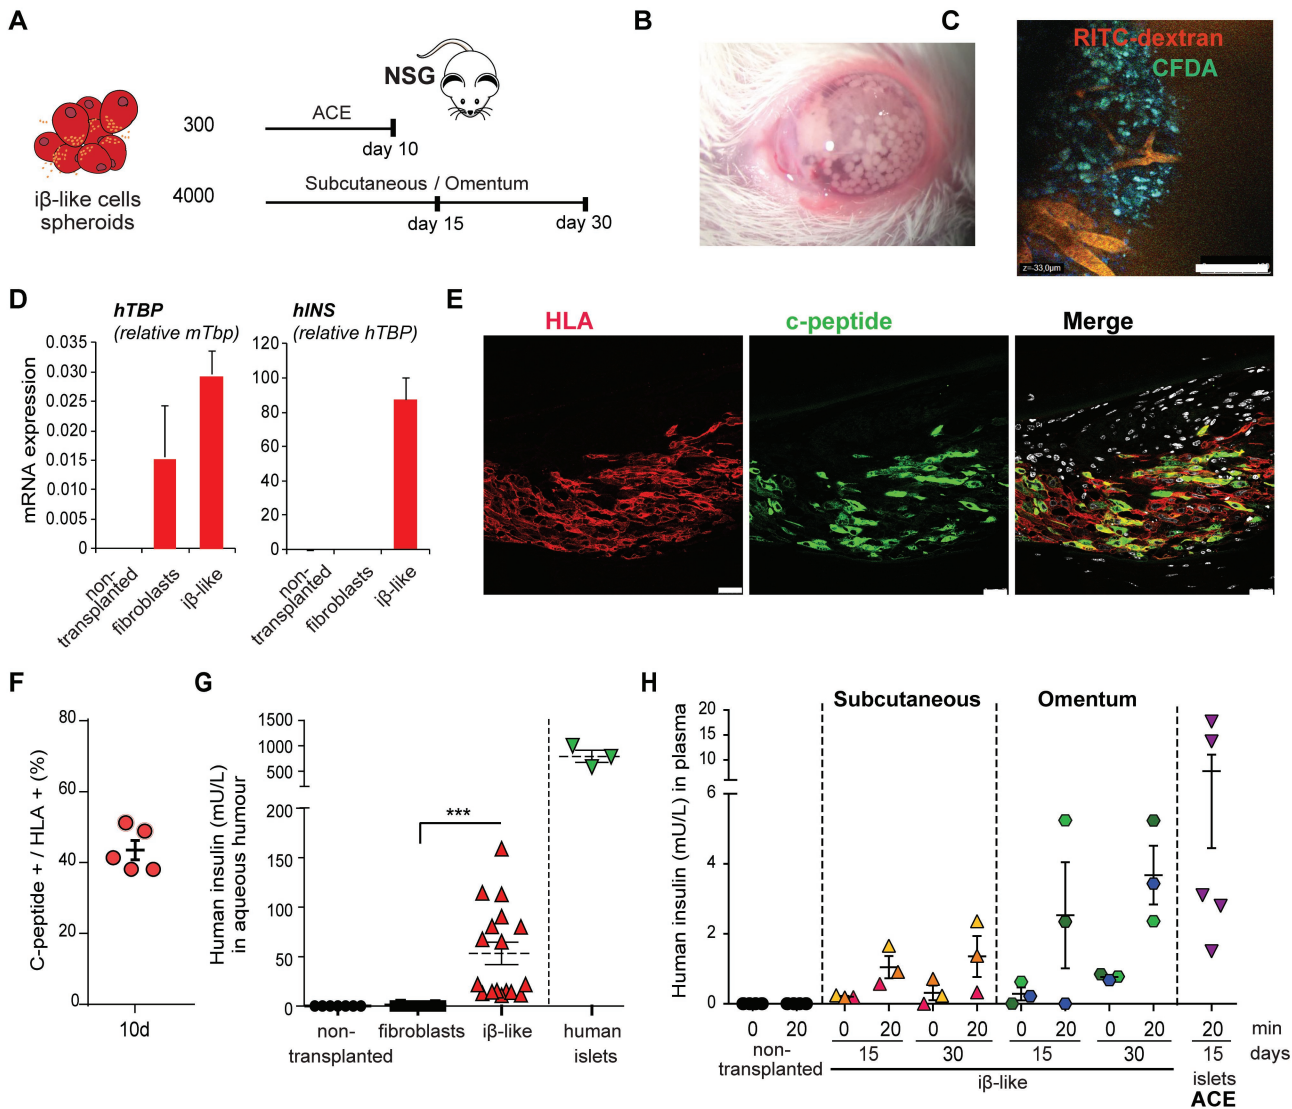

## **Supplemental information**

**for**

### **DIRECT REPROGRAMMING OF HUMAN FIBROBLASTS INTO INSULIN- PRODUCING CELLS BY TRANSCRIPTION FACTORS**

Marta Fontcuberta-PiSunyer, Ainhoa García-Alamán, Èlia Prades, Noèlia Téllez, Hugo Figueiredo, Rebeca Fernandez-Ruiz, Sara Cervantes, Carlos Enrich, Laura Clua, Javier Ramón-Azcón, Christophe Broca, Anne Wojtuszczy, Anna Novials, Nuria Montserrat, Josep Vidal, Ramon Gomis, Rosa Gasa

This document contains:

- Figures S1 to S6: pages 2-6
- Tables S1-S3: pages 7-11
- Video captions: page 12

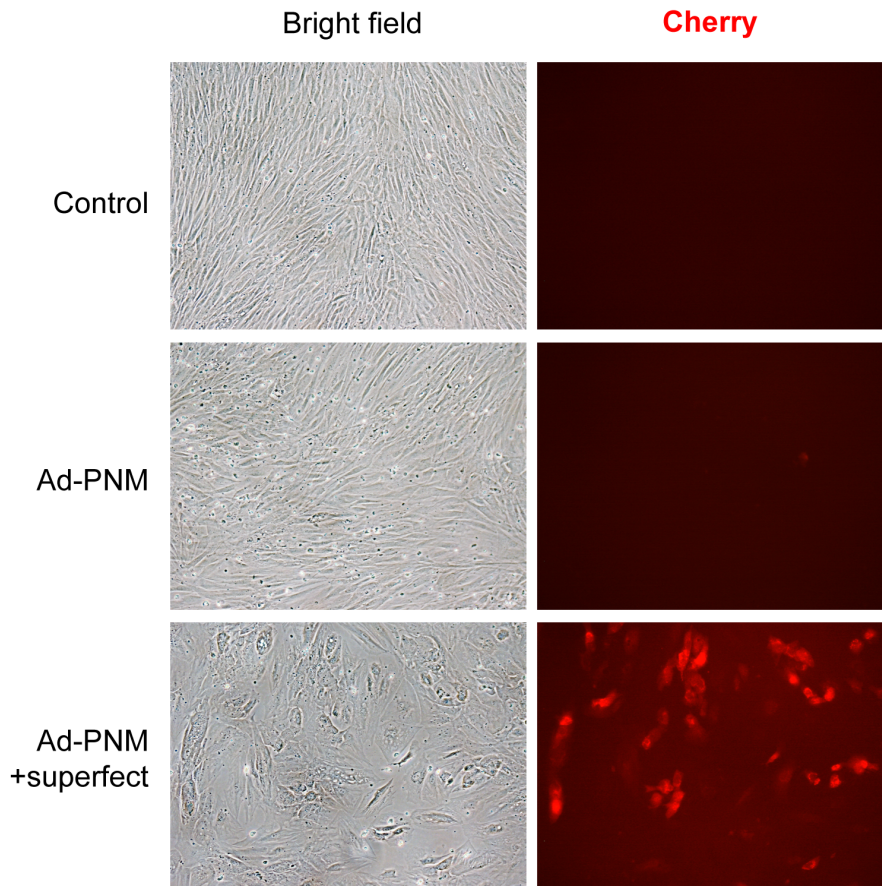

**Supplementary S1.** Human primary foreskin fibroblasts HFF1 were treated for 14h with a polycistronic recombinant adenovirus (Ad-PNM) encoding the PNM factors (Pdx1, Neurog3 and Mafa) and a Cherry reporter protein, in the presence or absence of the Superfect transfection reagent. Bright field and Cherry immunofluorescence images from control (parental) fibroblasts and HFF1 fibroblasts four days after infection.



**A**

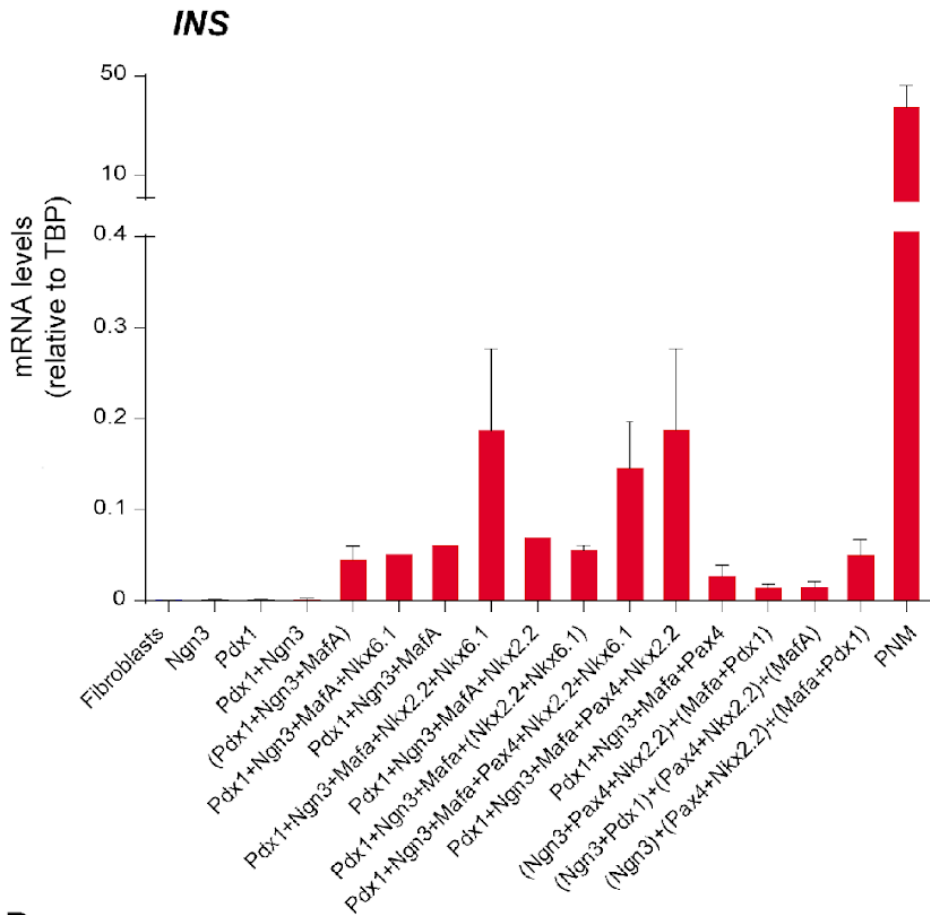

**B**

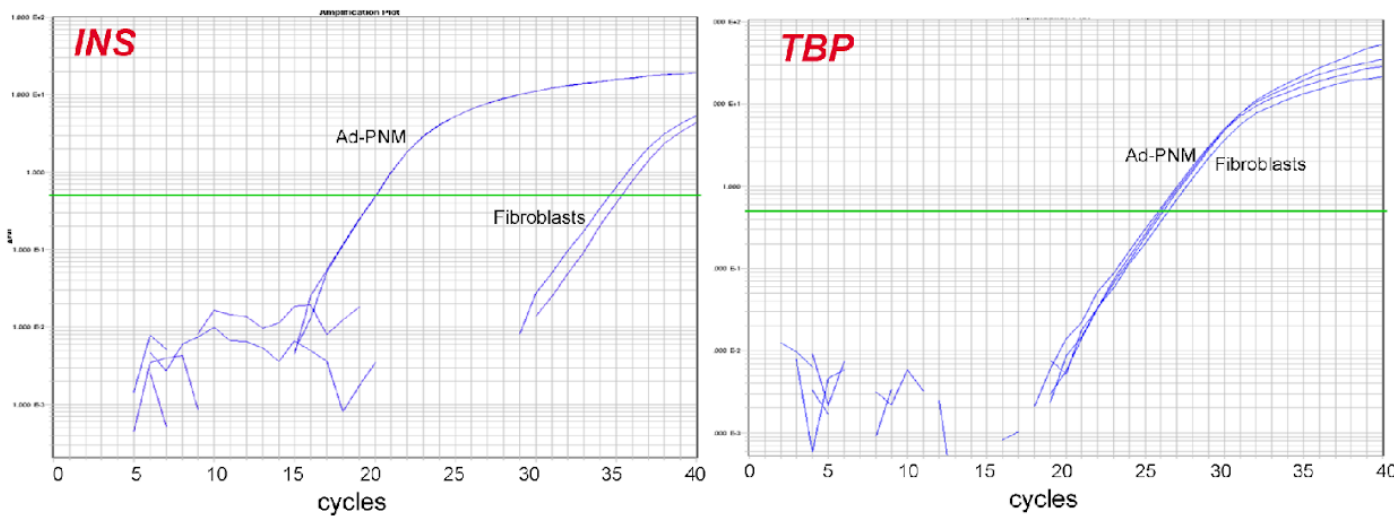

**Supplementary S2. (A)** qRT-PCR for human *INS* in human foreskin fibroblasts HFF1 ten days after infection with the recombinant adenoviruses encoding the indicated transcription factors. All adenoviruses except Ad-PNM encoded a single transcription factor. Adenoviruses that were added simultaneously are shown in parenthesis. Order of addition is left to right. Expression levels were calculated relative to *TBP*. Data are mean  $\pm$  SEM for n=2-9. **(B)** Real time amplification plots for *INS* and *TBP* in parental fibroblasts and in fibroblasts seven days after infection with Ad-PNM.

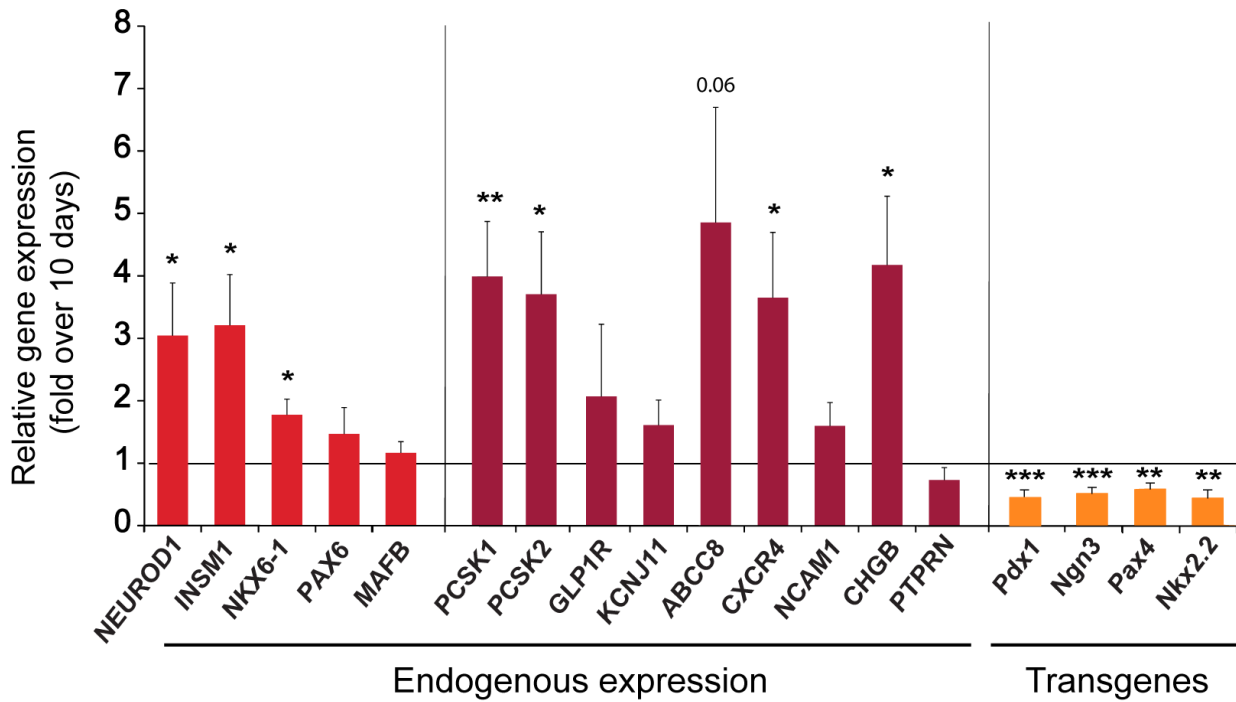

**Supplementary S3:** qRT-PCR of the indicated genes at day 21 after initiation of reprogramming. Transcript levels are expressed relative to levels in cells at day 10 of the reprogramming protocol (given the value of 1). Cells were maintained in 2D culture throughout the duration of the experiment. Data are mean  $\pm$  SEM for n=9-13, from 7 reprogramming experiments. \*P< 0.05, \*\*P< 0.01, \*\*\*, P< 0.001, vs.  $\beta$ -cells at day10 using

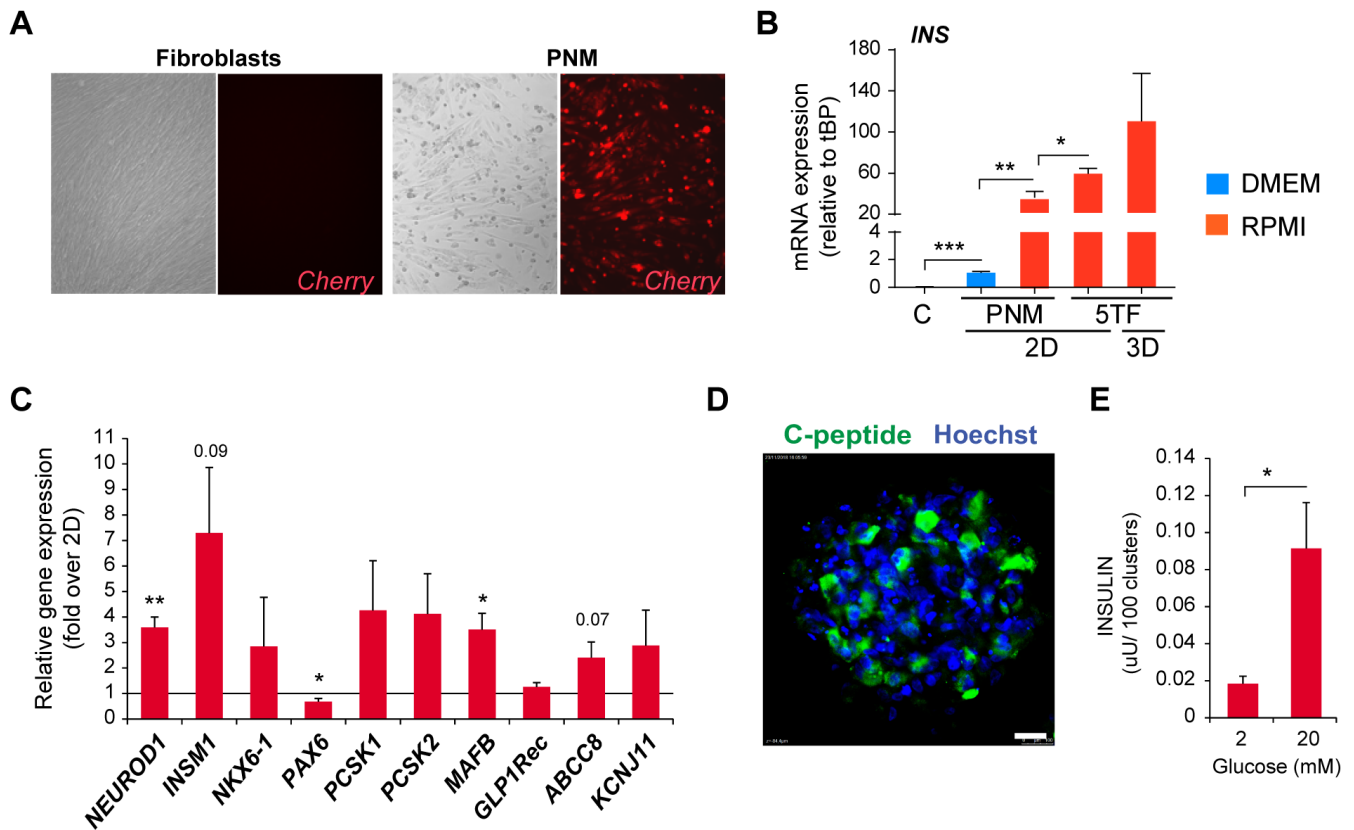

**Supplementary S4:** Human primary foreskin fibroblasts HFF2 were subjected to transcription factor-based reprogramming towards insulin-producing cells. **(A)** Bright field and Cherry immunofluorescence images from control (parental) fibroblasts and from fibroblasts three days after infection with Ad-PNM. Scale bar is 100  $\mu$ m. **(B)** qRT-PCR for *INS* in HFF2 ten days after infection with Ad-PNM alone and cultured under 2D conditions in DMEM (blue) or RPMI-1640 media (red) ( $n=6$ ), or subjected to the 5TF reprogramming protocol and cultured in RPMI-1640 media under 2D or 3D ( $n=4$ ) conditions as indicated. Expression levels were calculated relative to *TBP*. Note that changes in *INS* gene expression in the different reprogramming conditions follow a similar trend as observed with HFF1 fibroblasts. **(C)** qRT-PCR of the indicated genes in HFF2-derived  $i\beta$ -like cell spheroids ( $n=6$ ) Transcript levels are expressed relative to HFF2-derived  $i\beta$ -like cells maintained in 2D culture throughout the 10-day protocol (given the value of 1). **(D)** Representative immunofluorescence image showing C-peptide staining in green and nuclei in blue (marked with Hoechst). Scale bar is 100  $\mu$ m. **(E)** In vitro glucose-induced insulin secretion by  $i\beta$ -like cell spheroids. Data are calculated as mean  $\pm$  SEM for 3 independent experiments, 1-3 replicates per experiment. \*,  $P < 0.05$ ; \*\*,  $P < 0.01$ ; \*\*\*,  $P < 0.001$  relative to 2D in C using one-sample test, or between indicated conditions in B and E using unpaired t-test.

**A**

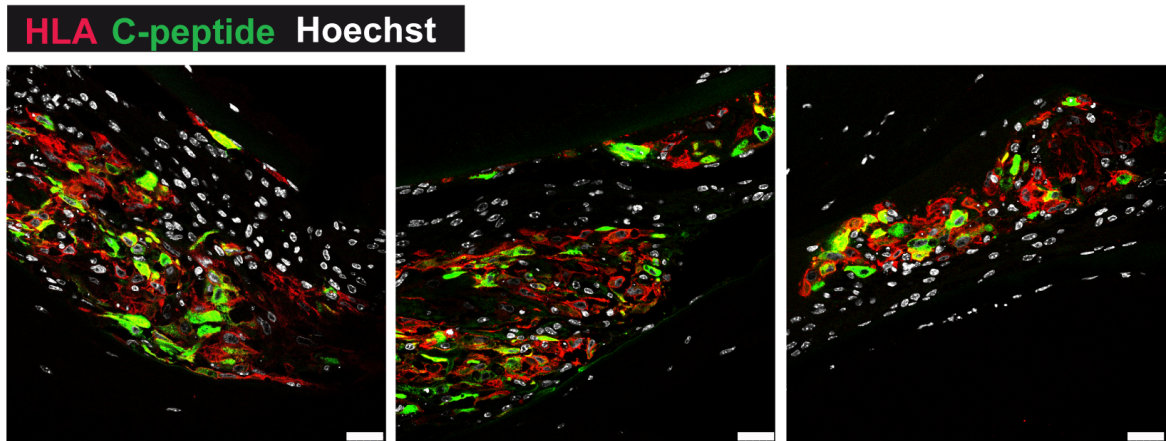

**B**

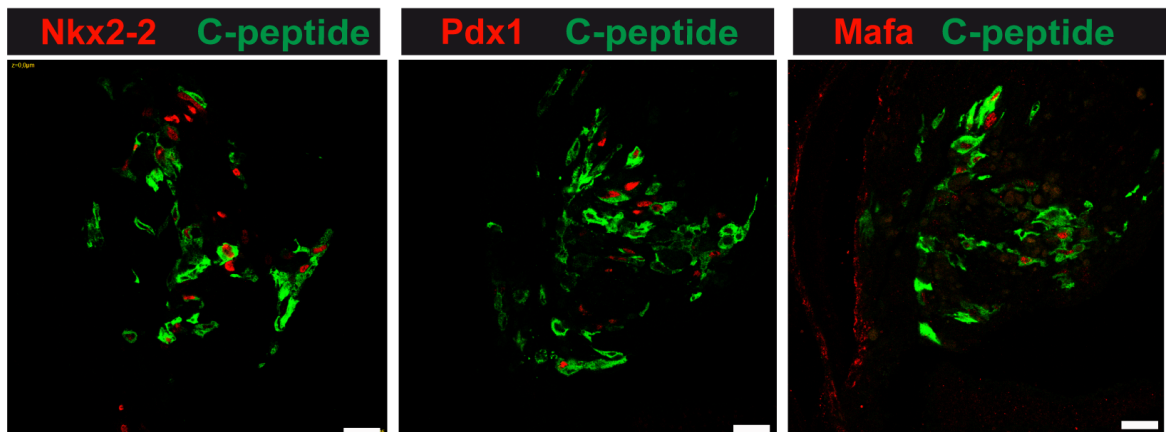

**Supplementary S5:** Immunostaining of iβ-cell spheroids ten days after their transplantation into the anterior chamber of the eye of NSG mice. Representative immunofluorescence images showing **(A)** C-peptide staining (green), HLA (red) and cell nuclei marked with Hoechst (white) and **(B)** C-peptide (green) with the indicated transcription factors (red). Scale bars are 25 μm.

**Table S1.** Comparison of gene expression levels between i $\beta$ -cells maintained in 2D culture, i $\beta$ -cell spheroids (3D) and human islets for the indicated genes. Fold expression values are calculated using qPCR data presented in Figures 1D&E, 2A, 3A-C and 5C.

| <b>Gene</b>               | <b>Fold expression<br/>Islets/ i<math>\beta</math>-cells 2D</b> | <b>Fold expression<br/>Islets/ i<math>\beta</math>-cell 3D</b> |
|---------------------------|-----------------------------------------------------------------|----------------------------------------------------------------|
| <b><i>ABCC8</i></b>       | 2335                                                            | 450                                                            |
| <b><i>CHGB</i></b>        | 23036                                                           | 9251                                                           |
| <b><i>CX36</i></b>        | 3589                                                            | 399                                                            |
| <b><i>CXCR4</i></b>       | 6                                                               | 2                                                              |
| <b><i>GIPR</i></b>        | 10                                                              | 6                                                              |
| <b><i>GLP1R</i></b>       | 163                                                             | 100                                                            |
| <b><i>INS</i></b>         | 358                                                             | 205                                                            |
| <b><i>INSM1</i></b>       | 134                                                             | 41                                                             |
| <b><i>KCNJ11</i></b>      | 51                                                              | 12                                                             |
| <b><i>MAFB</i></b>        | 8                                                               | 4                                                              |
| <b><i>NCAM1</i></b>       | 2                                                               | 2                                                              |
| <b><i>NEUROD1</i></b>     | 200                                                             | 63                                                             |
| <b><i>NEUROG3</i></b>     | 2                                                               | 3                                                              |
| <b><i>NKX2-2</i></b>      | 196                                                             | 265                                                            |
| <b><i>NKX6-1</i></b>      | 117                                                             | 37                                                             |
| <b><i>PAX4</i></b>        | 14                                                              | 9                                                              |
| <b><i>PAX6</i></b>        | 425                                                             | 327                                                            |
| <b><i>PCSK1</i></b>       | 16                                                              | 5                                                              |
| <b><i>PCSK2</i></b>       | 81                                                              | 48                                                             |
| <b><i>PDX1</i></b>        | 115                                                             | 68                                                             |
| <b><i>PTPRN (IA2)</i></b> | 30                                                              | 25                                                             |

**Table S2.** Comparison of circulating human insulin levels in transplanted mice between our study and several publications using stem cell-derived  $\beta$ -like cells.

| Cells                                                | Number of cells      | Site           | Days post-transplantation | Insulin ( $\mu$ U/ml) |               | Source                                                  |
|------------------------------------------------------|----------------------|----------------|---------------------------|-----------------------|---------------|---------------------------------------------------------|
|                                                      |                      |                |                           | basal                 | after glucose |                                                         |
| i $\beta$ -like cells                                | 4 x 10 <sup>6</sup>  | Subcutaneous   | day 15                    | 0.18-0.24             | 0.57-1.67     | our study                                               |
|                                                      |                      |                | day 30                    | 0-0.71                | 0.33-2.36     |                                                         |
| i $\beta$ -like cells                                | 4 x 10 <sup>6</sup>  | omentum        | day 15                    | 0-0.63                | 0-5.24        | our study                                               |
|                                                      |                      |                | day 30                    | 0-5.2                 | 2.36-5.23     |                                                         |
| hES-derived endoderm                                 | 15 x 10 <sup>6</sup> | epididymal fat | day 94                    | 13-36                 | 56-110        | Kroon et al. Nature Biotech 26, 443-452, 2008           |
| hES-derived (PH, original differentiation protocol)  | 5 x 10 <sup>6</sup>  | kidney capsule | day 15                    | 0-0.5                 | 0-1           | Pagliuca et al. Cell 159, 428-439, 2014                 |
| hES-derived SC- $\beta$ cells (optimized protocol)   | 5 x 10 <sup>6</sup>  | kidney capsule | day 15                    | 1-5                   | 1-11          |                                                         |
| hiPSC-derived SC- $\beta$ cells (optimized protocol) | 5 x 10 <sup>6</sup>  | kidney capsule | day 15                    | 5                     | 7.5           | Millman et al. Nat Commun 7, 11463, 2016                |
| hES-derived SC- $\beta$ cells (optimized protocol)   | 5 x 10 <sup>6</sup>  | kidney capsule | day 180                   | 11                    | 23            | Velazco-Cruz et al. Stem cell Reports 12, 351-365, 2019 |

**Table S3.** List of oligonucleotides used for real time PCR.

| <b>Gene</b>   | <b>Species</b> | <b>Primer ID</b> | <b>Primer sequence (5' to 3')</b> |
|---------------|----------------|------------------|-----------------------------------|
| <b>ABCC8</b>  | human          | <i>Forward</i>   | AGACCCTCATGAACCGACAG              |
| <b>ABCC8</b>  | human          | <i>Reverse</i>   | GGCTCTGTGGCTTTTCTCTC              |
| <b>ARX</b>    | human          | <i>Forward</i>   | GCAAGGAGGTGTGCTAAAGG              |
| <b>ARX</b>    | human          | <i>Reverse</i>   | GGAGTGTGCTGGTCTCTGT               |
| <b>CD29</b>   | human          | <i>Forward</i>   | CAAAGGAACAGCAGAGAAGC              |
| <b>CD29</b>   | human          | <i>Reverse</i>   | ATTGAGTAAGACAGGTCCATAAGG          |
| <b>CD49a</b>  | human          | <i>Forward</i>   | GCTGGCTCCTCACTGTTGTT              |
| <b>CD49a</b>  | human          | <i>Reverse</i>   | CTCCATTTGGGTTGGTGA CT             |
| <b>CHGB</b>   | human          | <i>Reverse</i>   | TTGGATGTCCTCCTCCCCTG              |
| <b>CHGB</b>   | human          | <i>Forward</i>   | CGCCAAGTCCTGAAGACGA               |
| <b>COL1A1</b> | human          | <i>Forward</i>   | CTCGAGGTGGACACCACCT               |
| <b>COL1A1</b> | human          | <i>Reverse</i>   | CAGCTGGATGGCCACATCGG              |
| <b>CX36</b>   | human          | <i>Forward</i>   | GCAGCAGCACTCCACTATGA              |
| <b>CX36</b>   | human          | <i>Reverse</i>   | TACACCGTCTCCCCACAAT               |
| <b>CXCL12</b> | human          | <i>Forward</i>   | GAGCCAACGTCAAGCATCTC              |
| <b>CXCL12</b> | human          | <i>Reverse</i>   | AGCTTCGGGTCAATGCACA               |
| <b>CXCR4</b>  | human          | <i>Forward</i>   | CGTCTCAGTGCCCTTTTGTTT             |
| <b>CXCR4</b>  | human          | <i>Reverse</i>   | CTGAAGTAGTGGGCTAAGGGC             |
| <b>FOXF2</b>  | human          | <i>Forward</i>   | CTACTTGCACCAGAACGCTC              |
| <b>FOXF2</b>  | human          | <i>Reverse</i>   | CGCAGGGCTTAATATCCTGACA            |
| <b>GCG</b>    | human          | <i>Forward</i>   | CACAGGGCACATTCACCAG               |
| <b>GCG</b>    | human          | <i>Reverse</i>   | TCTGGGAAATCTCGCCTTCC              |
| <b>GIPR</b>   | human          | <i>Forward</i>   | ACAATGTGAGAACCCAGAGAAG            |
| <b>GIPR</b>   | human          | <i>Reverse</i>   | CGCCTGAACAACTCAAGATG              |
| <b>GLP1R</b>  | human          | <i>Forward</i>   | TTCTCTGCTCTGGTTATCGCC             |
| <b>GLP1R</b>  | human          | <i>Reverse</i>   | GGATGCAAACAGGTTTCAGGT             |
| <b>HNF1B</b>  | human          | <i>Forward</i>   | ACCAAGCCGGTCTTCCATACT             |
| <b>HNF1B</b>  | human          | <i>Reverse</i>   | GGTGTGTCATAGTCGTCCGCC             |
| <b>IGFBP4</b> | human          | <i>Forward</i>   | TGTTGCACCATCTGCTTGGT              |
| <b>IGFBP4</b> | human          | <i>Reverse</i>   | ATGTACCCACCTCCCTAGC               |
| <b>INS</b>    | human          | <i>Forward</i>   | GCAGCCTTTGTGAACCAACA              |
| <b>INS</b>    | human          | <i>Reverse</i>   | TTCCCCGCACACTAGGTAGAGA            |
| <b>INSM1</b>  | human          | <i>Forward</i>   | TTTTGGAACCCCACTTTTAC              |
| <b>INSM1</b>  | human          | <i>Reverse</i>   | CGAGACCAGACCGCATTT                |
| <b>KCNJ11</b> | human          | <i>Forward</i>   | TGTGTCACCAGCATCCACTC              |
| <b>KCNJ11</b> | human          | <i>Reverse</i>   | CACTTGGACCTCAATGGAGAA             |
| <b>LDHA</b>   | human          | <i>Forward</i>   | GCAAGAGGGAGAAAGCCGTC              |
| <b>LDHA</b>   | human          | <i>Reverse</i>   | CTTCCAAGCCACGTAGGTCA              |
| <b>LHX9</b>   | human          | <i>Forward</i>   | TGCCAAGGACGGTAGCATTT              |

|                       |       |                |                                |
|-----------------------|-------|----------------|--------------------------------|
| <b>LHX9</b>           | human | <i>Reverse</i> | GCAGCTCAGGTGGTAGACAG           |
| <b>MafA</b>           | mouse | <i>Forward</i> | CTTCAGCAAGGAGGAGGTCA           |
| <b>MafA</b>           | mouse | <i>Reverse</i> | TTGTACAGGTCCCGCTCTTT           |
| <b>MAFB</b>           | human | <i>Forward</i> | AACTTTGTCTTGGGGCACAC           |
| <b>MAFB</b>           | human | <i>Reverse</i> | GGGACCTCTCGGTTCTCTCT           |
| <b>MCT1 (SLC16A1)</b> | human | <i>Forward</i> | CACCAGCGAAGTGTCATGGA           |
| <b>MCT1 (SLC16A1)</b> | human | <i>Reverse</i> | ATCAAGCCACAGCCTGACAA           |
| <b>MYT1</b>           | human | <i>Forward</i> | AGTGTCTGCCAGGTGTCTT            |
| <b>MYT1</b>           | human | <i>Reverse</i> | GACAGACAATAGCTGTGGGGA          |
| <b>NCAM 1</b>         | human | <i>Forward</i> | CCTCCCAGCCAGCAGATTAC           |
| <b>NCAM1</b>          | human | <i>Reverse</i> | CTCTCCAACGCTGATCTCCC           |
| <b>NEUROD1</b>        | human | <i>Forward</i> | AGGAAGAAGAGGAAGAGGAGGATG       |
| <b>NEUROD1</b>        | human | <i>Reverse</i> | TTGGTGGTGGGTTGGGATAAG          |
| <b>NEUROG3</b>        | human | <i>Forward</i> | AGACGACGCGAAGCTCACC            |
| <b>NEUROG3</b>        | human | <i>Reverse</i> | AAGCCAGACTGCCTGGGCT            |
| <b>Neurog3</b>        | mouse | <i>Forward</i> | CCCACCTAGCCCCACTCTCATACC       |
| <b>Neurog3</b>        | mouse | <i>Reverse</i> | CGCCGGCTTCTTCGCTGTTT           |
| <b>NKX2.2</b>         | human | <i>Forward</i> | CTTCTACGACAGCAGCGACAACCC<br>G  |
| <b>NKX2.2</b>         | human | <i>Reverse</i> | CCTTGGAGAAAAGCACTCGCCGCT<br>TT |
| <b>NKX6-1</b>         | human | <i>Forward</i> | ACACGAGACCCACTTTTTCCG          |
| <b>NKX6-1</b>         | human | <i>Reverse</i> | GCCCCGCCAAGTATTTTGT            |
| <b>OAT</b>            | human | <i>Forward</i> | CGTAAGTGGGGCTATAACCGT          |
| <b>OAT</b>            | human | <i>Reverse</i> | CTGGTTGGGTCTGTGGAAC            |
| <b>P4H</b>            | human | <i>Forward</i> | TCGAGTTCACCGAGCAGACA           |
| <b>P4H</b>            | human | <i>Reverse</i> | GAACAGCAGGATGTGAGTCTTGA        |
| <b>PAX4</b>           | human | <i>Forward</i> | AGCAGAGGCACTGGAGAAAGAGTT       |
| <b>PAX4</b>           | human | <i>Reverse</i> | CAGCTGCATTTCCCACTTGAGCTT       |
| <b>PAX6</b>           | human | <i>Forward</i> | AGACACAGCCCTCACAAACA           |
| <b>PAX6</b>           | human | <i>Reverse</i> | ATCATAACTCCGCCATTCA            |
| <b>PCSK1</b>          | human | <i>Forward</i> | AAGCAAACCCAAATCTCACCTGGC       |
| <b>PCSK1</b>          | human | <i>Reverse</i> | TCACCATCAAGCCTGCTCCATTCT       |
| <b>PCSK2</b>          | human | <i>Forward</i> | CCGGGTTCTCTTCTGTGTC            |
| <b>PCSK2</b>          | human | <i>Reverse</i> | AGCAAAGGGAAGCTTTCGGA           |
| <b>PDGFRA</b>         | human | <i>Forward</i> | TGTGGGACATTCATTGCGGA           |
| <b>PDGFRA</b>         | human | <i>Reverse</i> | AAGCTGGCAGAGGATTAGGC           |
| <b>PDX1</b>           | human | <i>Forward</i> | CCCATGGATGAAGTCTACC            |
| <b>PDX1</b>           | human | <i>Reverse</i> | GTCTCCTCCTTTTTCCAC             |
| <b>Pdx1</b>           | mouse | <i>Forward</i> | CCCAGTTTACAAGCTCGCT            |
| <b>Pdx1</b>           | mouse | <i>Reverse</i> | CTCGGTTCCATTCGGGAAAGG          |
| <b>PRRX1</b>          | human | <i>Forward</i> | CGAGAGTGCAGGTGTGTTT            |



|                           |                 |                |                         |
|---------------------------|-----------------|----------------|-------------------------|
| <b><i>PRRX1</i></b>       | human           | <i>Reverse</i> | GAGCAGGACGAGGTACGATG    |
| <b><i>REST</i></b>        | human           | <i>Forward</i> | CTCATACAGGAGAACGCCCA    |
| <b><i>REST</i></b>        | human           | <i>Reverse</i> | GAGGCCACATAACTGCACTG    |
| <b><i>PTPRN (IA2)</i></b> | human           | <i>Reverse</i> | GGTGGAGGATGGTGTCAAGC    |
| <b><i>PTPRN (IA2)</i></b> | human           | <i>Forward</i> | AAGCTCCGCACCAGAAAGTC    |
| <b><i>SMAD3</i></b>       | human           | <i>Forward</i> | CATCGAGCCCCAGAGCAATA    |
| <b><i>SMAD3</i></b>       | human           | <i>Reverse</i> | TTTGGAGAACCTGCGTCCAT    |
| <b><i>SST</i></b>         | human           | <i>Forward</i> | CAGTTTCTGCAGAAGTCCCTG   |
| <b><i>SST</i></b>         | human           | <i>Reverse</i> | AATTCTTGCAGCCAGCTTTGC   |
| <b><i>TBP</i></b>         | human           | <i>Forward</i> | ATCCCTCCCCATGACTCCCATG  |
| <b><i>TBP</i></b>         | human           | <i>Reverse</i> | ATGATTACCGCAGCAAACCGC   |
| <b><i>Tbp</i></b>         | mouse           | <i>Forward</i> | ACCCTTCACCAATGACTCCTATG |
| <b><i>Tbp</i></b>         | mouse           | <i>Reverse</i> | ATGATGACTGCAGCAAATCGC   |
| <b><i>TBP</i></b>         | human(specific) | <i>Forward</i> | TGTGCTCACCCACCAACAAT    |
| <b><i>TBP</i></b>         | human(specific) | <i>Reverse</i> | ACGTCGTCTTCCTGAATCCC    |
| <b><i>TWIST2</i></b>      | human           | <i>Forward</i> | CGCAAGTGGAATTGGGATGC    |
| <b><i>TWIST2</i></b>      | human           | <i>Reverse</i> | CGATGTCACTGCTGTCCCTT    |

## **VIDEO CAPTIONS**

### **Video S1**

Video shows changes in fluorescence of an isolated  $\beta$ -like cell in response to high glucose (20mM) and high potassium (KCl 30mM). Cell had been pre-loaded with the calcium indicator Fluo-2. Video was recorded using a Leica TCS SPE confocal microscope with an incubation chamber set at 37°C, and a 40X oil immersion objective.

### **Video S2**

Video shows fluorescence of parental fibroblasts HFF1 in response to high glucose (20mM) and high potassium (KCl 30mM). Cells had been pre-loaded with the calcium indicator Fluo-2. Note that fibroblasts exhibit no changes in fluorescence in response to the tested stimuli. Video was recorded using a Leica TCS SPE confocal microscope with an incubation chamber set at 37°C, and a 40X oil immersion objective.
